# Supplementary material for: Synthesis, structure, and spectral, electrochemical and fluoride sensing properties of meso-pyrrolyl boron dipyrromethene
Source: Royal Society of Chemistry journal article supplement (doi:10.1039/c5dt02634b), 2015-01-01
Supplement: c5dt02634b1.pdf [file c5dt02634b1.pdf]

## Supporting Information

### Synthesis, Structure, Spectral, Electrochemical and Fluoride Sensing Properties of *meso*-Pyrrolyl Boron Dipyrromethene

Booruga Umasekhar, Emandi Ganapathi, Tamal Chatterjee and Mangalampalli  
Ravikanth\*

Department of Chemistry, Indian Institute of Technology Bombay, Mumbai 400076, India.  
E-mail: [ravikanth@chem.iitb.ac.in](mailto:ravikanth@chem.iitb.ac.in)

| Entry | Contents                                                                                           | Page no |
|-------|----------------------------------------------------------------------------------------------------|---------|
| 1     | <b>Figure S1.</b> HRMS spectrum of compound <b>5</b>                                               | 3       |
| 2     | <b>Figure S2.</b> $^1\text{H}$ NMR spectrum of compound <b>5</b> recorded in $\text{CDCl}_3$       | 4       |
| 3     | <b>Figure S3.</b> $^1\text{H}$ NMR spectrum of compound <b>5</b> recorded in $\text{DMSO-d}_6$     | 5       |
| 4     | <b>Figure S4.</b> $^1\text{H}$ - $^1\text{H}$ COSY spectrum of compound <b>5</b>                   | 6       |
| 5     | <b>Figure S5.</b> $^{13}\text{C}$ NMR spectrum of compound <b>5</b>                                | 7       |
| 6     | <b>Figure S6.</b> $^{19}\text{F}$ NMR spectrum of compound <b>5</b>                                | 8       |
| 7     | <b>Figure S7.</b> $^{11}\text{B}$ NMR spectrum of compound <b>5</b>                                | 9       |
| 8     | <b>Figure S8.</b> HRMS spectrum of compound <b>6</b>                                               | 10      |
| 9     | <b>Figure S9.</b> $^1\text{H}$ NMR spectrum of compound <b>6</b>                                   | 11      |
| 10    | <b>Figure S10.</b> $^{13}\text{C}$ NMR spectrum of compound <b>6</b>                               | 12      |
| 11    | <b>Figure S11.</b> $^{19}\text{F}$ NMR spectrum of compound <b>6</b> recorded in $\text{CDCl}_3$   | 13      |
| 12    | <b>Figure S12.</b> $^{19}\text{F}$ NMR spectrum of compound <b>6</b> recorded in $\text{DMSO-d}_6$ | 14      |
| 13    | <b>Figure S13.</b> $^{11}\text{B}$ NMR spectrum of compound <b>6</b>                               | 15      |
| 14    | <b>Figure S14.</b> Comparison of $^1\text{H}$ -NMR spectra of compound <b>5</b> and <b>6</b>       | 16      |
| 15    | <b>Figure S15.</b> HRMS spectrum of compound <b>7</b>                                              | 17      |
| 16    | <b>Figure S16.</b> $^1\text{H}$ NMR spectrum of compound <b>7</b>                                  | 18      |
| 17    | <b>Figure S17.</b> $^{19}\text{F}$ NMR spectrum of compound <b>7</b>                               | 19      |
| 18    | <b>Figure S18.</b> $^{11}\text{B}$ NMR spectrum of compound <b>7</b>                               | 20      |
| 19    | <b>Figure S19.</b> HRMS spectrum of compound <b>8</b>                                              | 21      |
| 20    | <b>Figure S20.</b> $^1\text{H}$ NMR spectrum of compound <b>8</b>                                  | 22      |
| 21    | <b>Figure S21.</b> $^{19}\text{F}$ NMR spectrum of compound <b>8</b>                               | 23      |
| 22    | <b>Figure S22.</b> $^{11}\text{B}$ NMR spectrum of compound <b>8</b>                               | 24      |
| 23    | <b>Figure S23.</b> $^1\text{H}$ NMR spectrum of compound <b>9</b>                                  | 25      |
| 24    | <b>Figure S24.</b> $^1\text{H}$ - $^1\text{H}$ COSY spectrum of compound <b>9</b>                  | 26      |

|    |                                                                                                                                      |    |
|----|--------------------------------------------------------------------------------------------------------------------------------------|----|
| 25 | <b>Figure S25.</b> $^{13}\text{C}$ NMR spectrum of compound <b>9</b>                                                                 | 27 |
| 26 | <b>Figure S26.</b> $^{19}\text{F}$ NMR spectrum of compound <b>9</b>                                                                 | 28 |
| 27 | <b>Figure S27.</b> $^{11}\text{B}$ NMR spectrum of compound <b>9</b>                                                                 | 29 |
| 28 | <b>Figure S28.</b> $^1\text{H}$ NMR spectrum of compound <b>11</b>                                                                   | 30 |
| 29 | <b>Figure S29.</b> Comparison of absorption spectrum of compound <b>5</b>                                                            | 31 |
| 30 | <b>Figure S30.</b> Comparison of absorption spectrum of compound <b>6</b>                                                            | 32 |
| 31 | <b>Figure S31.</b> Comparison of absorption spectrum of compound <b>7</b>                                                            | 33 |
| 32 | <b>Figure S32.</b> Comparison of absorption spectrum of compound <b>8</b>                                                            | 34 |
| 33 | <b>Figure S33.</b> Comparison of absorption spectrum of compound <b>9</b>                                                            | 35 |
| 34 | <b>Figure S34.</b> Comparison of emission spectrum of compound <b>5</b>                                                              | 36 |
| 35 | <b>Figure S35.</b> Comparison of emission spectrum of compound <b>6</b>                                                              | 37 |
| 36 | <b>Figure S36.</b> Comparison of emission spectrum of compound <b>8</b>                                                              | 38 |
| 37 | <b>Figure S37.</b> Comparison of emission spectrum of compound <b>9</b>                                                              | 39 |
| 38 | <b>Figure S38.</b> Job's plot of compound <b>5</b>                                                                                   | 40 |
| 39 | <b>Figure S39.</b> Supramolecular assembly through a weak intermolecular hydrogen bonding network in BODIPY <b>5</b> .               | 41 |
| 40 | <b>Figure S40.</b> Supramolecular assembly through a weak intermolecular hydrogen bonding network in BODIPY <b>6</b> .               | 42 |
| 41 | <b>Figure S41.</b> Optical response of BODIPY <b>5</b> after addition of different anions                                            | 43 |
| 42 | Experimental details                                                                                                                 | 44 |
| 43 | <b>Figure S42.</b> Absorption spectrum of compound <b>5</b> with $\text{HPO}_4^{2-}$ and $\text{H}_2\text{PO}_4^-$                   | 45 |
| 44 | <b>Figure S43.</b> Absorption spectrum of compound <b>5</b> with $\text{F}^-$ in $\text{CH}_3\text{OH}$                              | 46 |
| 45 | <b>Figure S44.</b> Absorption spectrum titration of compound <b>5</b> with $\text{F}^-$ in $\text{CH}_3\text{CN}$                    | 47 |
| 46 | <b>Figure S45.</b> Absorption spectrum titration of compound <b>5</b> with $\text{F}^-$ in $\text{CH}_3\text{CN}:\text{H}_2\text{O}$ | 48 |

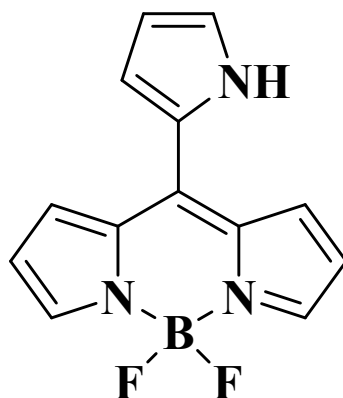

Calcd mol. wt. = 280.0830

Observed mol. Wt. = 280.0826

## DEPARTMENT OF CHEMISTRY, I.I.T.(B)

### Analysis Info

Analysis Name D:\Data\MAR 15\MR-US-PYR-BDP..d  
Method Tune\_pos\_NAICSI\_1000.m  
Sample Name MR-US-PYR-BDP  
Comment C62H52FeN2O2S2

Acquisition Date 3/16/2015 12:04:56 PM

Operator mr-rs-in  
Instrument maXis impact 282001.00081

### Acquisition Parameter

|             |          |                       |           |                  |           |
|-------------|----------|-----------------------|-----------|------------------|-----------|
| Source Type | ESI      | Ion Polarity          | Positive  | Set Nebulizer    | 0.3 Bar   |
| Focus       | Active   | Set Capillary         | 3700 V    | Set Dry Heater   | 180 °C    |
| Scan Begin  | 50 m/z   | Set End Plate Offset  | -500 V    | Set Dry Gas      | 4.0 l/min |
| Scan End    | 1000 m/z | Set Collision Cell RF | 900.0 Vpp | Set Divert Valve | Source    |

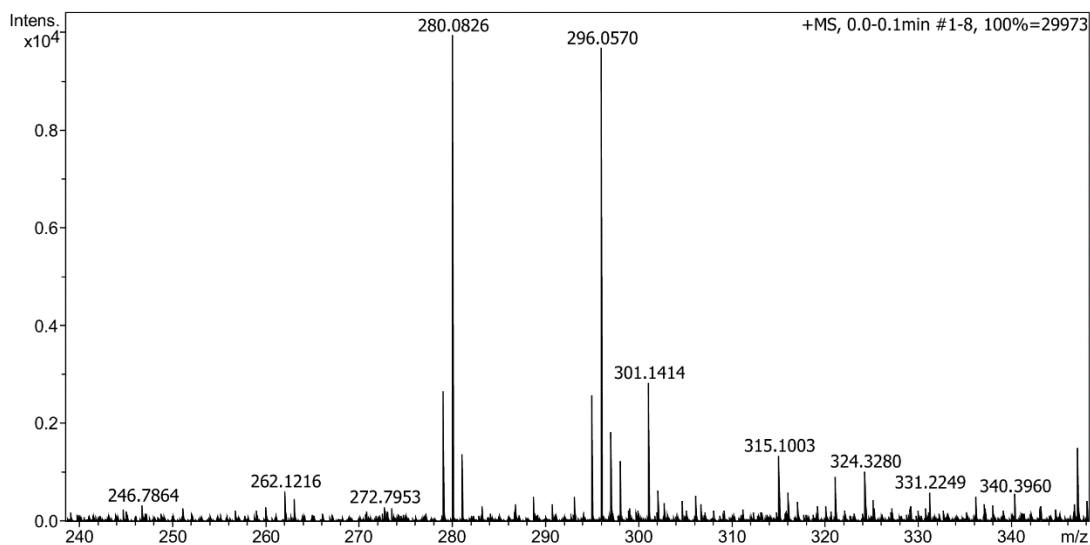

| Meas. m/z | # | Ion Formula   | m/z      | err [ppm] | mSigma | # Sigma | Score  | rdb | e <sup>-</sup> Conf | N-Rule |
|-----------|---|---------------|----------|-----------|--------|---------|--------|-----|---------------------|--------|
| 280.0826  | 1 | C13H10BF2N3Na | 280.0830 | 1.6       | 15.1   | 1       | 100.00 | 9.5 | even                | ok     |

**Figure S1: HRMS spectrum of compound 5**

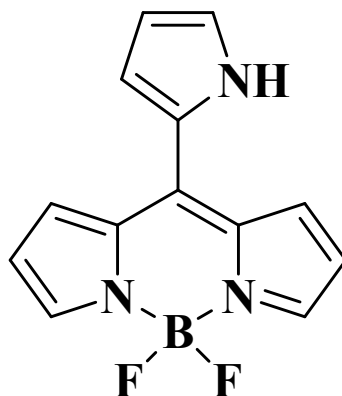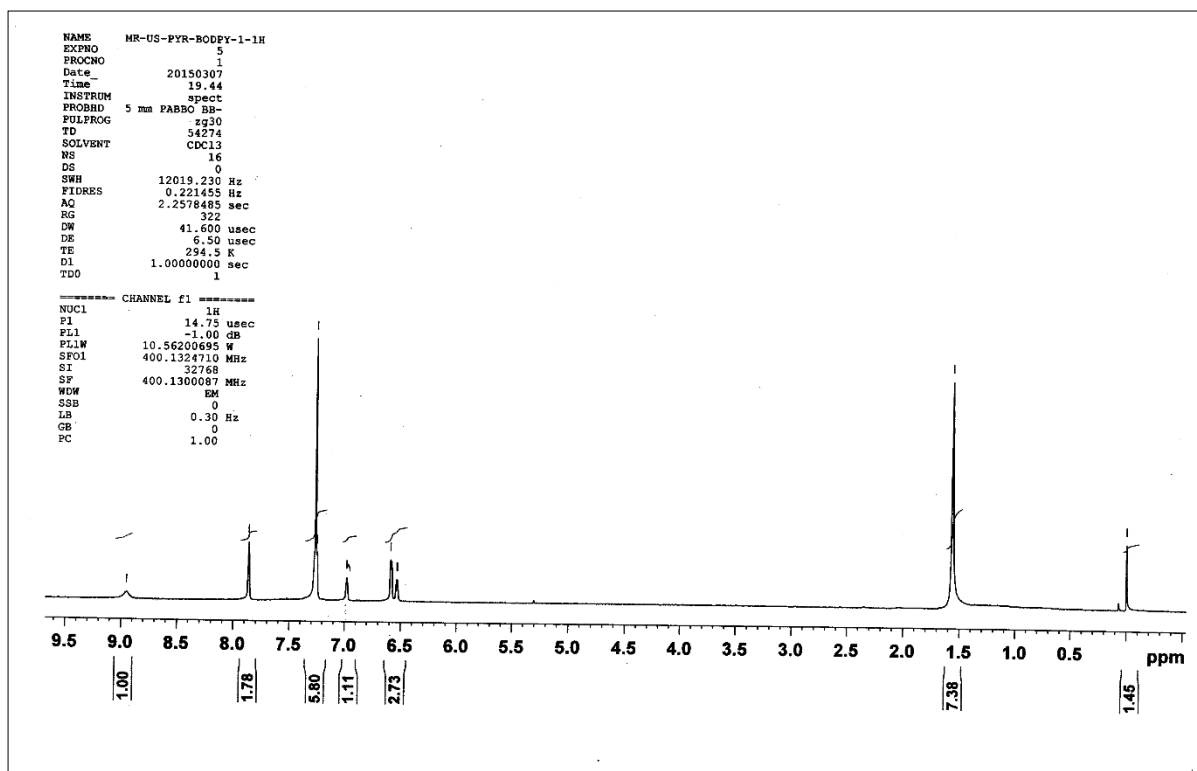

Figure S2:  $^1\text{H}$  NMR spectrum of compound **5** recorded in  $\text{CDCl}_3$ .

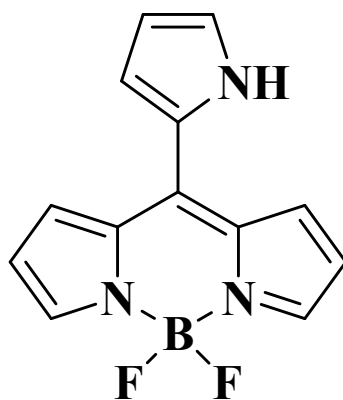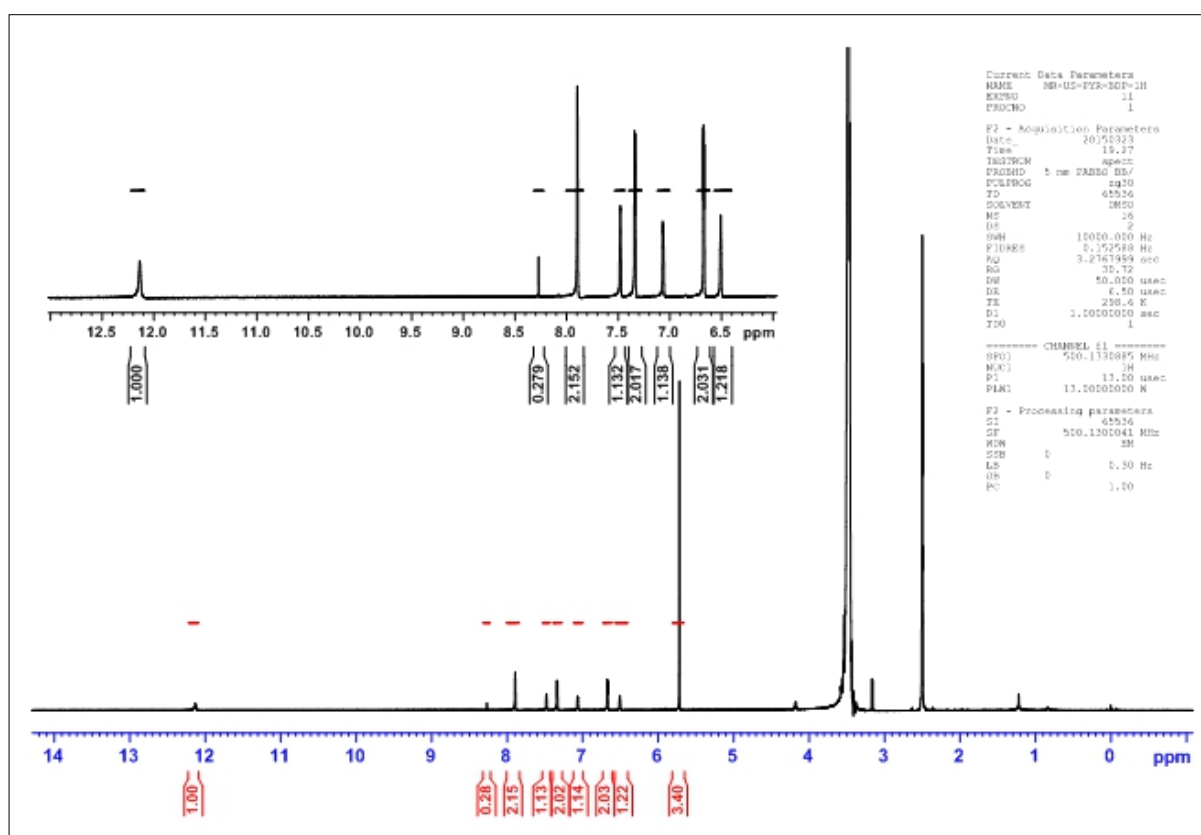

**Figure S3:**  $^1\text{H}$  NMR spectrum of compound **5** recorded in  $\text{DMSO-d}_6$ . Inset shows the expansion.

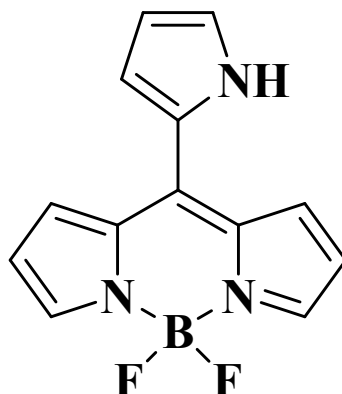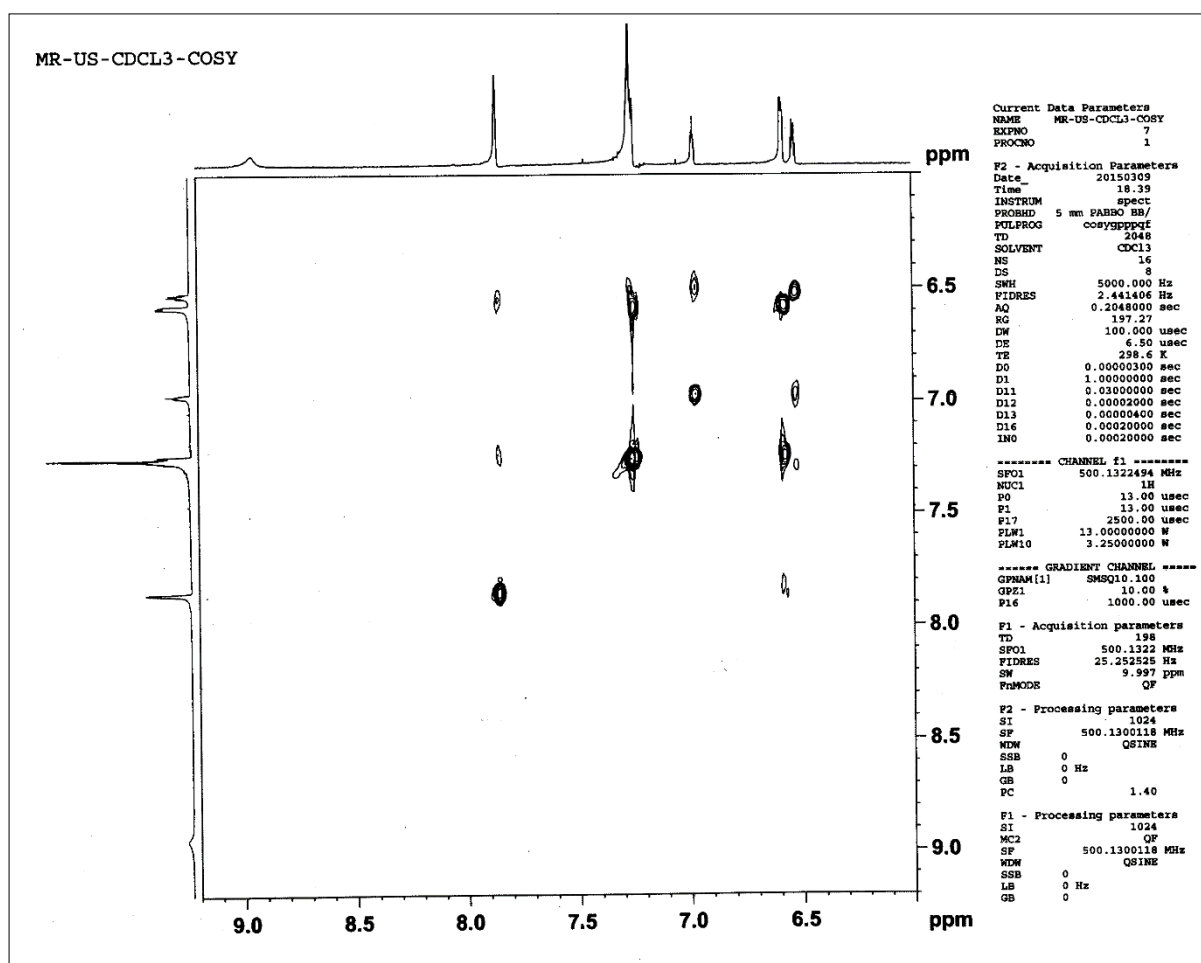

Figure S4: <sup>1</sup>H-<sup>1</sup>H COSY NMR spectrum of compound **5** recorded in CDCl<sub>3</sub>.

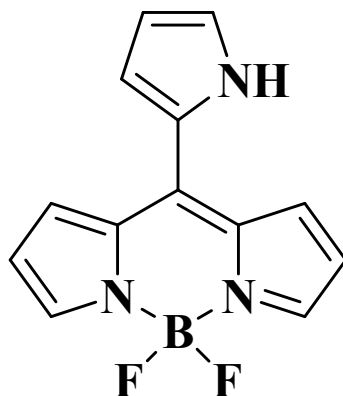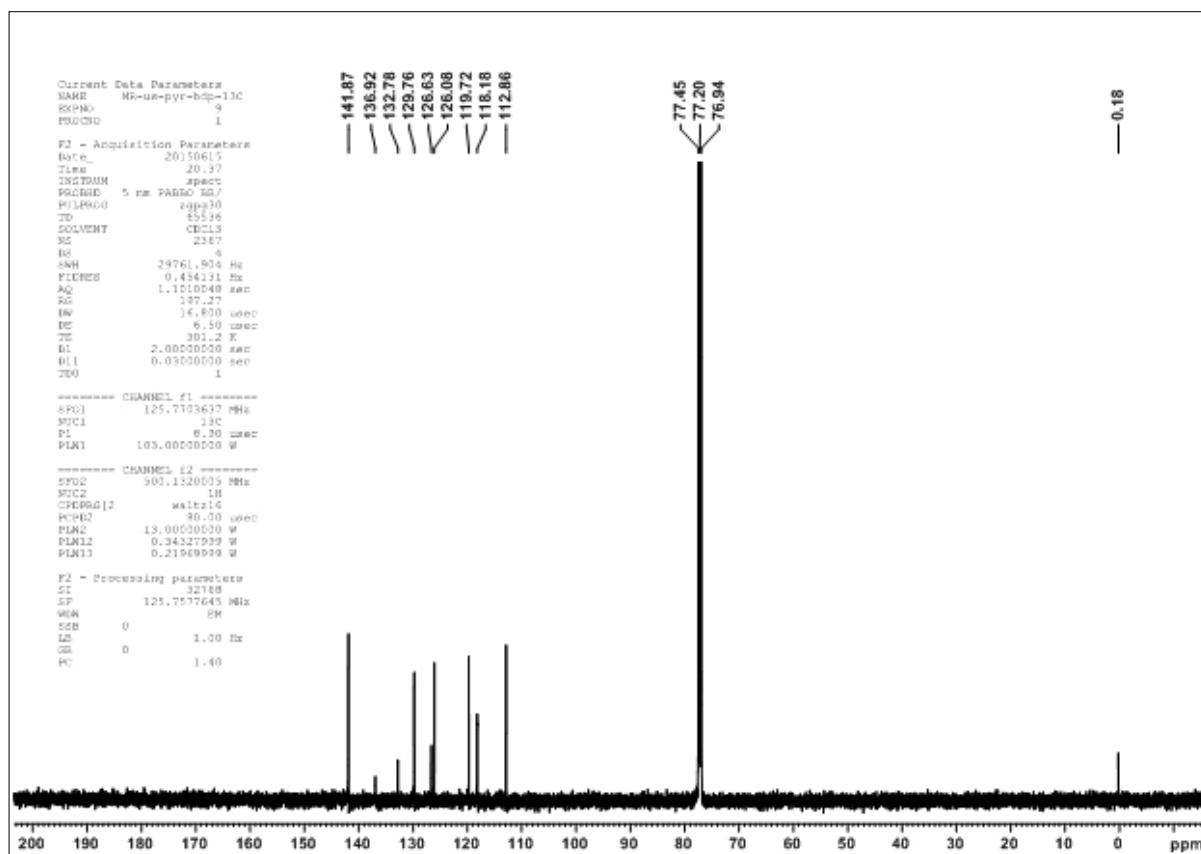

**Figure S5:**  $^{13}\text{C}$  NMR spectrum of compound **5** recorded in  $\text{CDCl}_3$ .

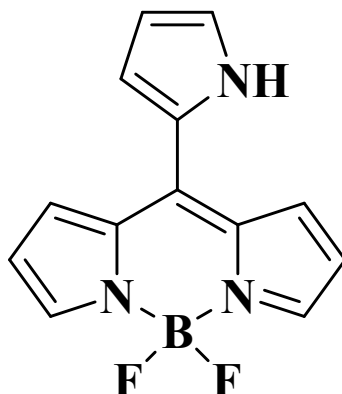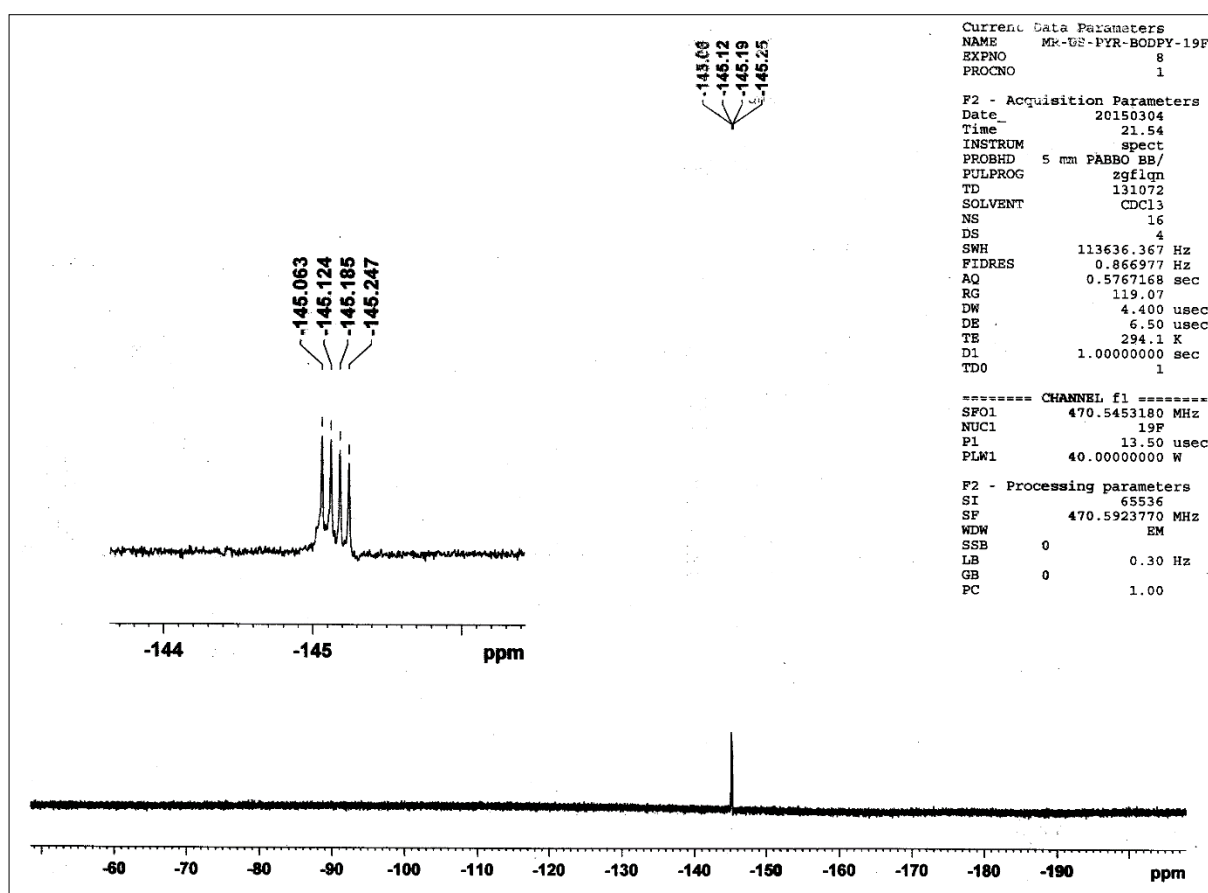

**Figure S6:**  $^{19}\text{F}$  NMR spectrum of compound **5** recorded in  $\text{CDCl}_3$ . Inset shows the expansion.



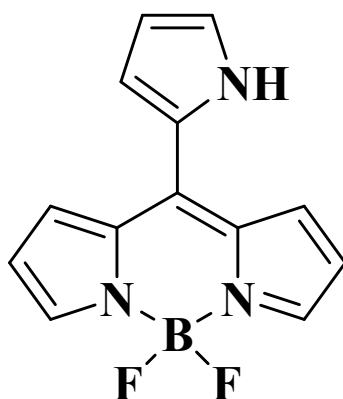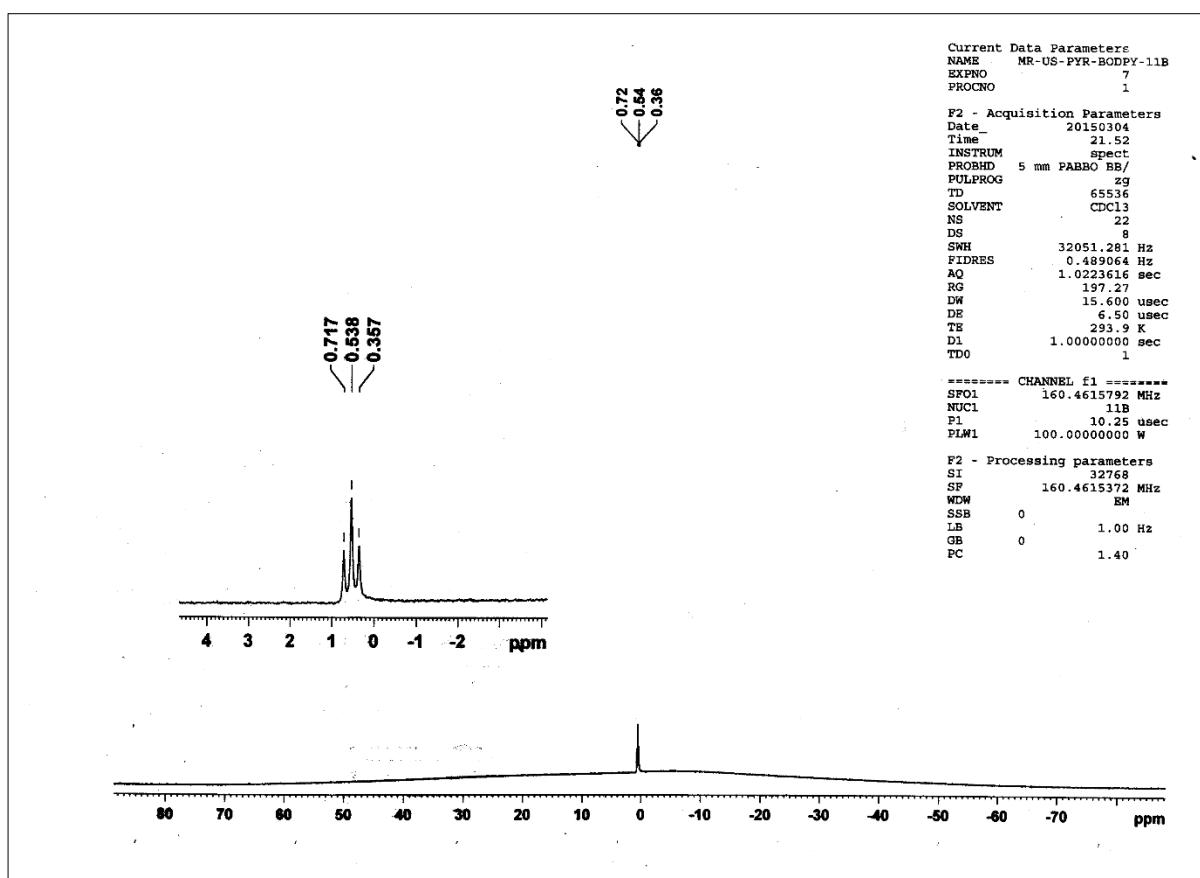

Figure S7:  $^{11}\text{B}$  NMR spectrum of compound **5** recorded in  $\text{CDCl}_3$ . Inset shows the expansion.

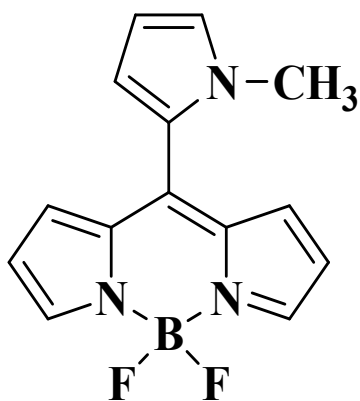

Calcd mol. wt. = 294.0987

Observed mol. Wt. = 294.0960

# DEPARTMENT OF CHEMISTRY, I.I.T.(B)

## Analysis Info

Analysis Name D:\Data\MAR 15\MR-US-MET-BDP.d  
 Method Tune\_pos\_NAF\_1000.m  
 Sample Name MR-US-MET-BDP  
 Comment C14H12BF2N3

Acquisition Date 3/23/2015 12:27:30 PM

Operator mr-rs-in  
 Instrument maXis impact 282001.00081

## Acquisition Parameter

|             |          |                       |            |                  |           |
|-------------|----------|-----------------------|------------|------------------|-----------|
| Source Type | ESI      | Ion Polarity          | Positive   | Set Nebulizer    | 0.3 Bar   |
| Focus       | Active   | Set Capillary         | 3800 V     | Set Dry Heater   | 180 °C    |
| Scan Begin  | 50 m/z   | Set End Plate Offset  | -500 V     | Set Dry Gas      | 4.0 l/min |
| Scan End    | 1000 m/z | Set Collision Cell RF | 1500.0 Vpp | Set Divert Valve | Source    |

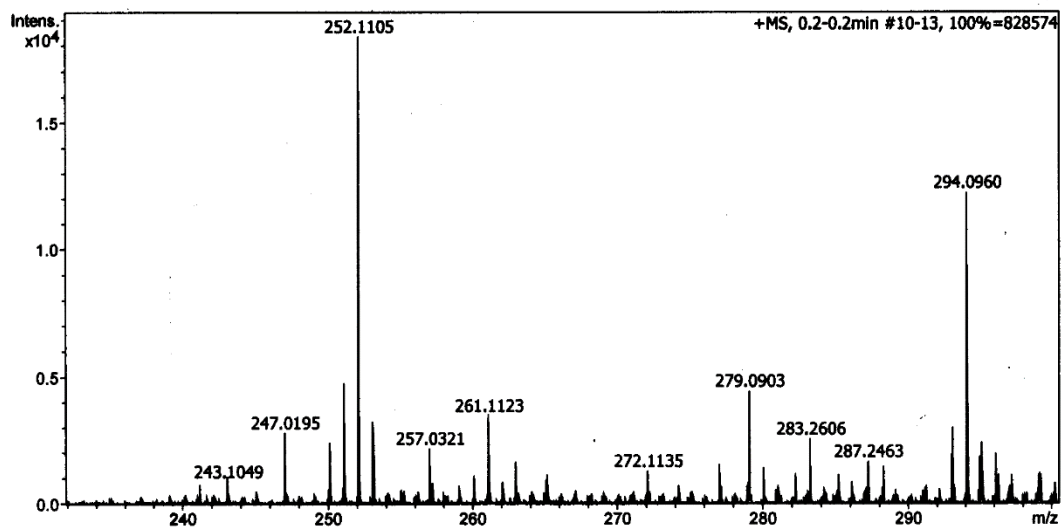

| Meas. m/z | # | Ion Formula   | m/z      | err [ppm] | mSigma | # Sigma | Score  | rdb | e <sup>-</sup> Conf | N-Rule |
|-----------|---|---------------|----------|-----------|--------|---------|--------|-----|---------------------|--------|
| 294.0960  | 1 | C14H12BF2N3Na | 294.0987 | -9.3      | 21.1   | 1       | 100.00 | 9.5 | even                | ok     |

Figure S8: HRMS spectrum of compound 6

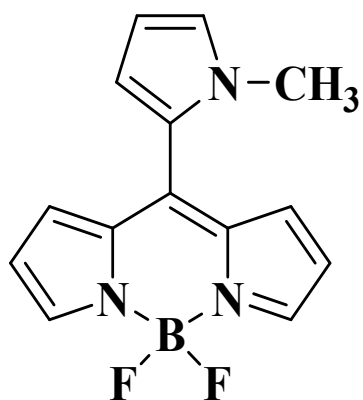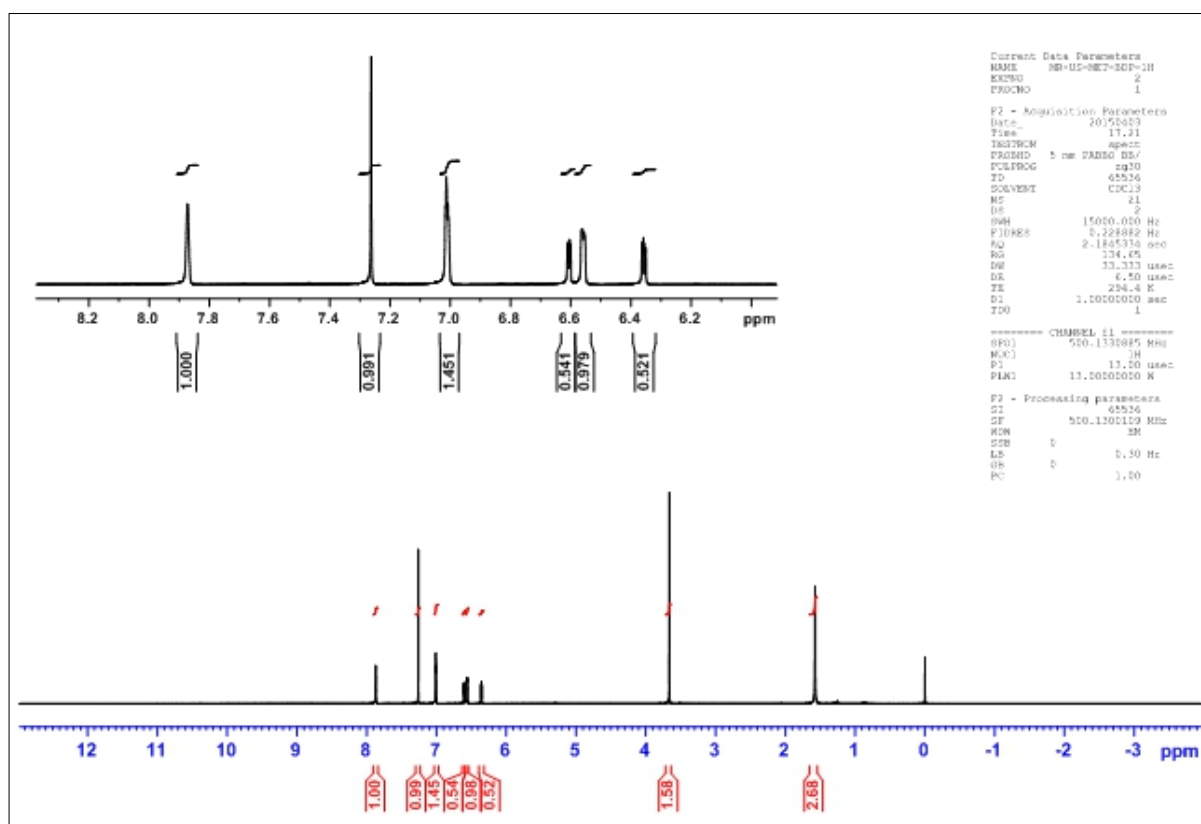

**Figure S9:**  $^1\text{H}$  NMR spectrum of compound **6** recorded in  $\text{CDCl}_3$ . Inset shows the expansion.

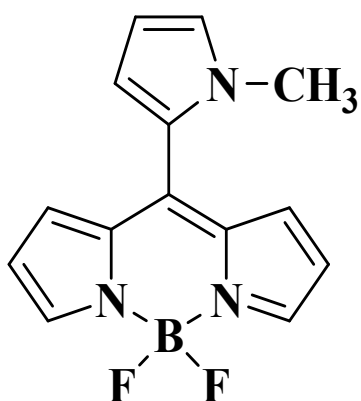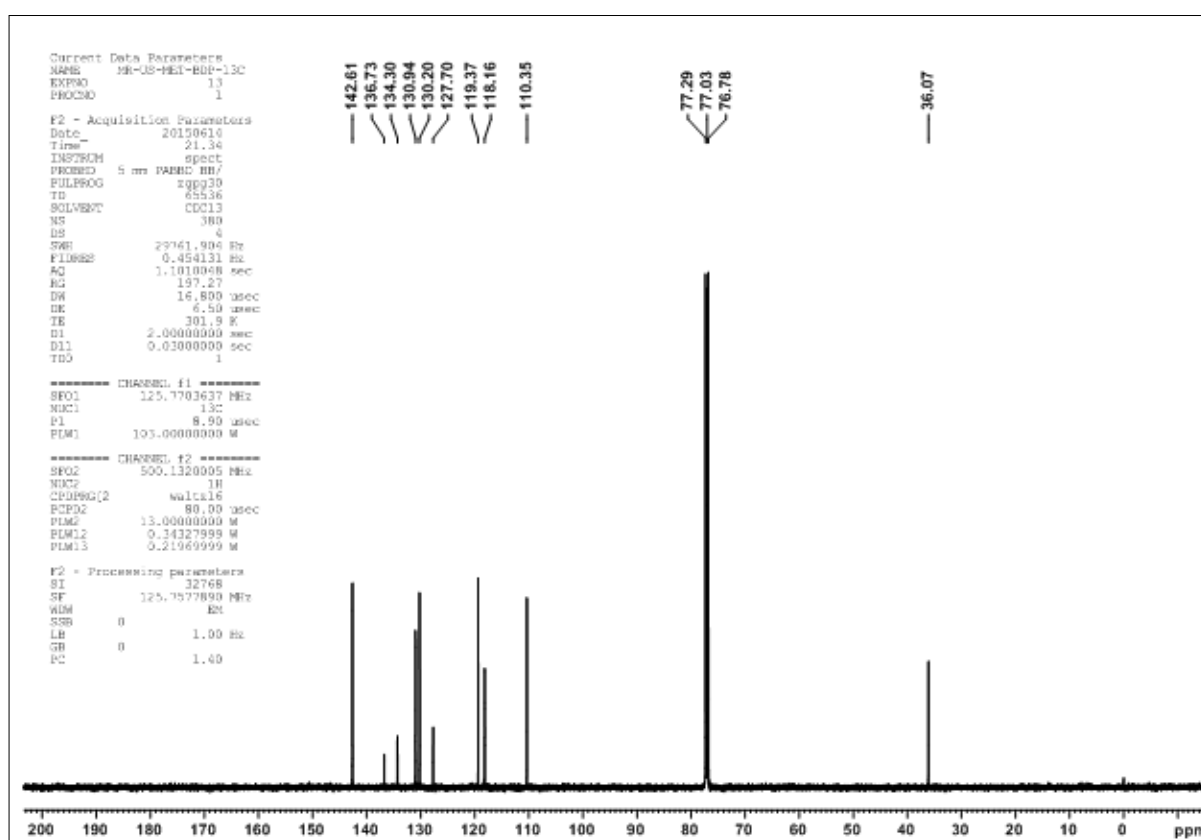

**Figure S10:**  $^{13}\text{C}$  NMR spectrum of compound **6** recorded in  $\text{CDCl}_3$ .

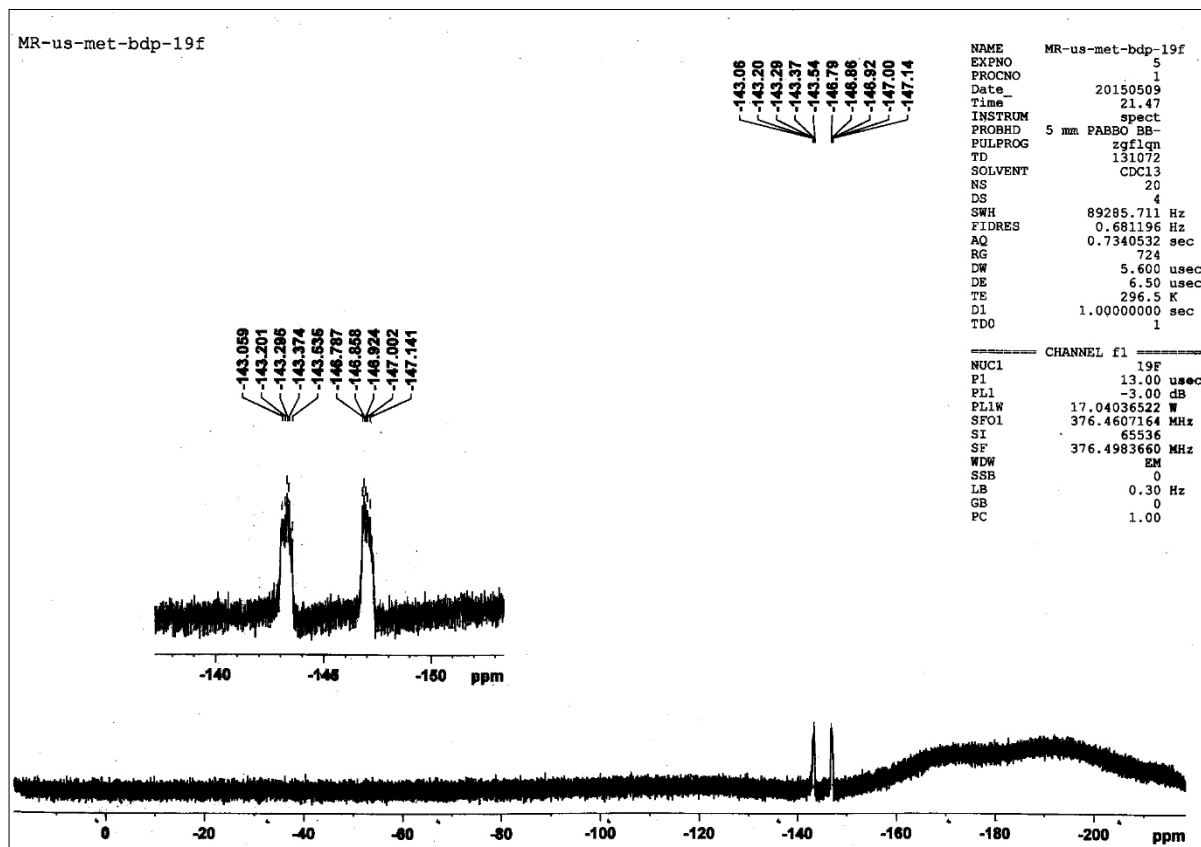

Figure S11:  $^{19}\text{F}$  NMR spectrum of compound **6** recorded in  $\text{CDCl}_3$ . Inset shows the expansion.

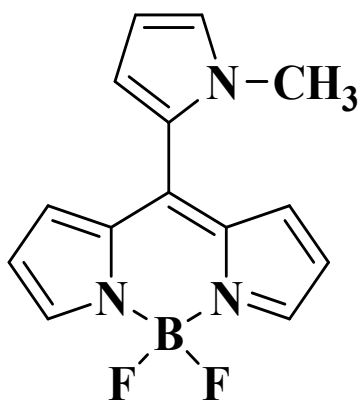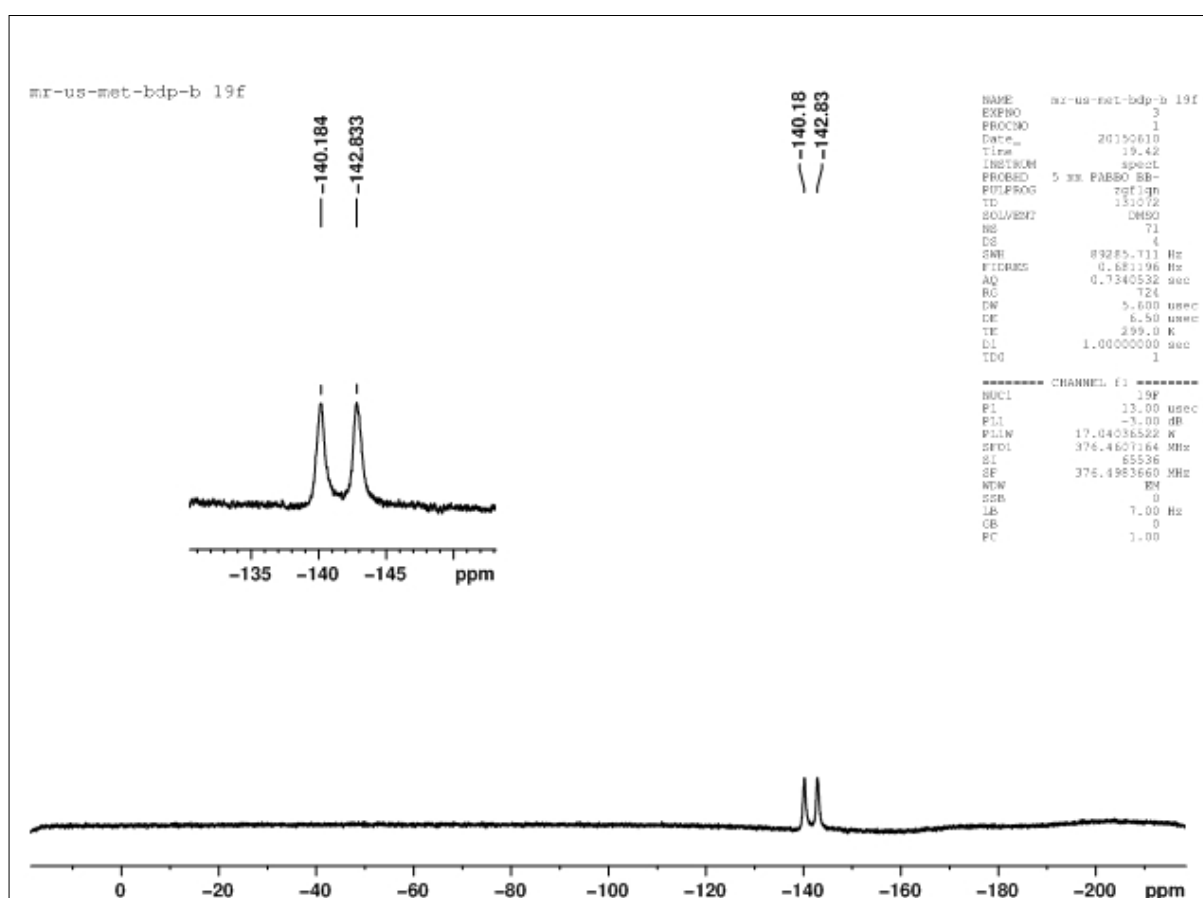

**Figure S12:**  $^{19}\text{F}$  NMR spectrum of compound **6** recorded in DMSO- $d_6$ . Inset shows the expansion.

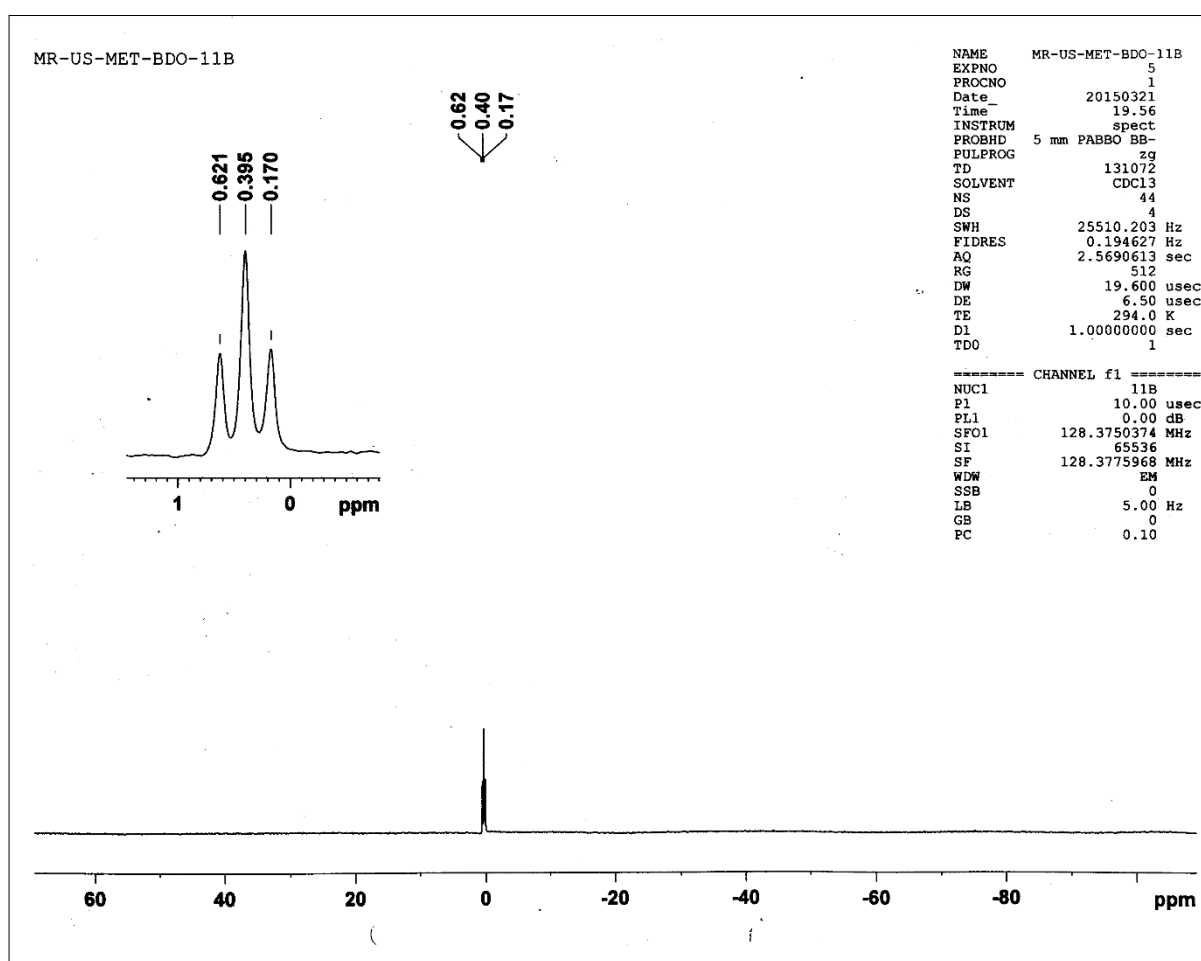

**Figure S13:**  $^{19}\text{B}$  NMR spectrum of compound **6** recorded in  $\text{CDCl}_3$ . Inset shows the expansion.

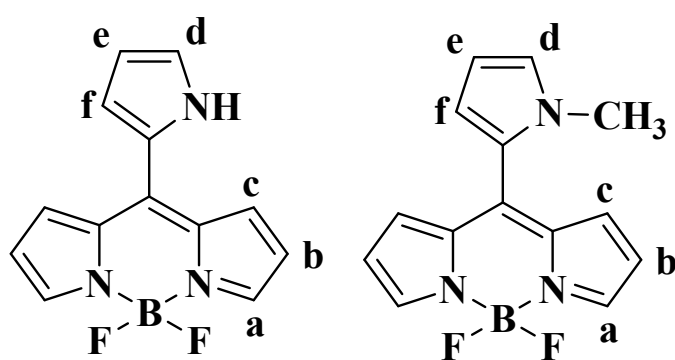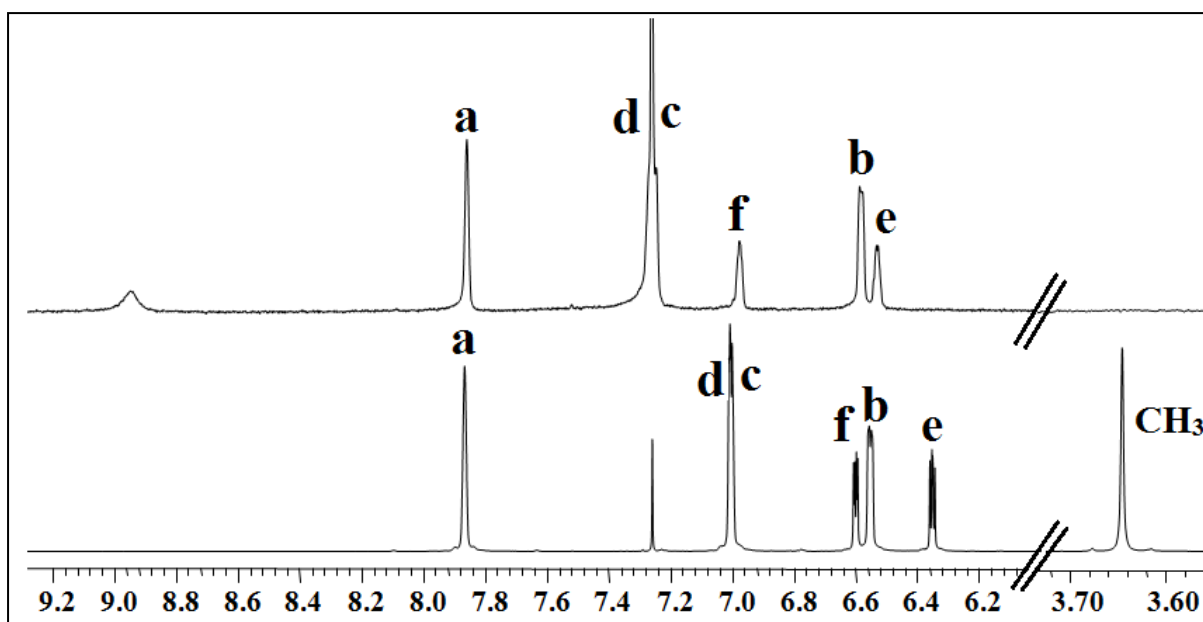

**Figure S14:** Comparison of <sup>1</sup>H NMR spectrum of compound **5** and **6** recorded in CDCl<sub>3</sub>.



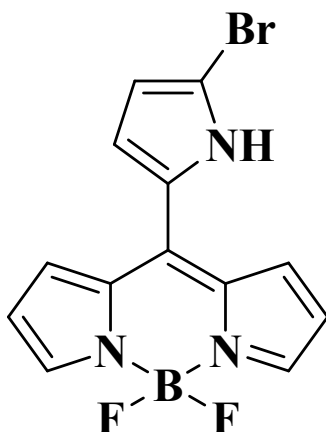

Calcd mol. wt. = 357.9936

Observed mol. Wt. = 357.9920

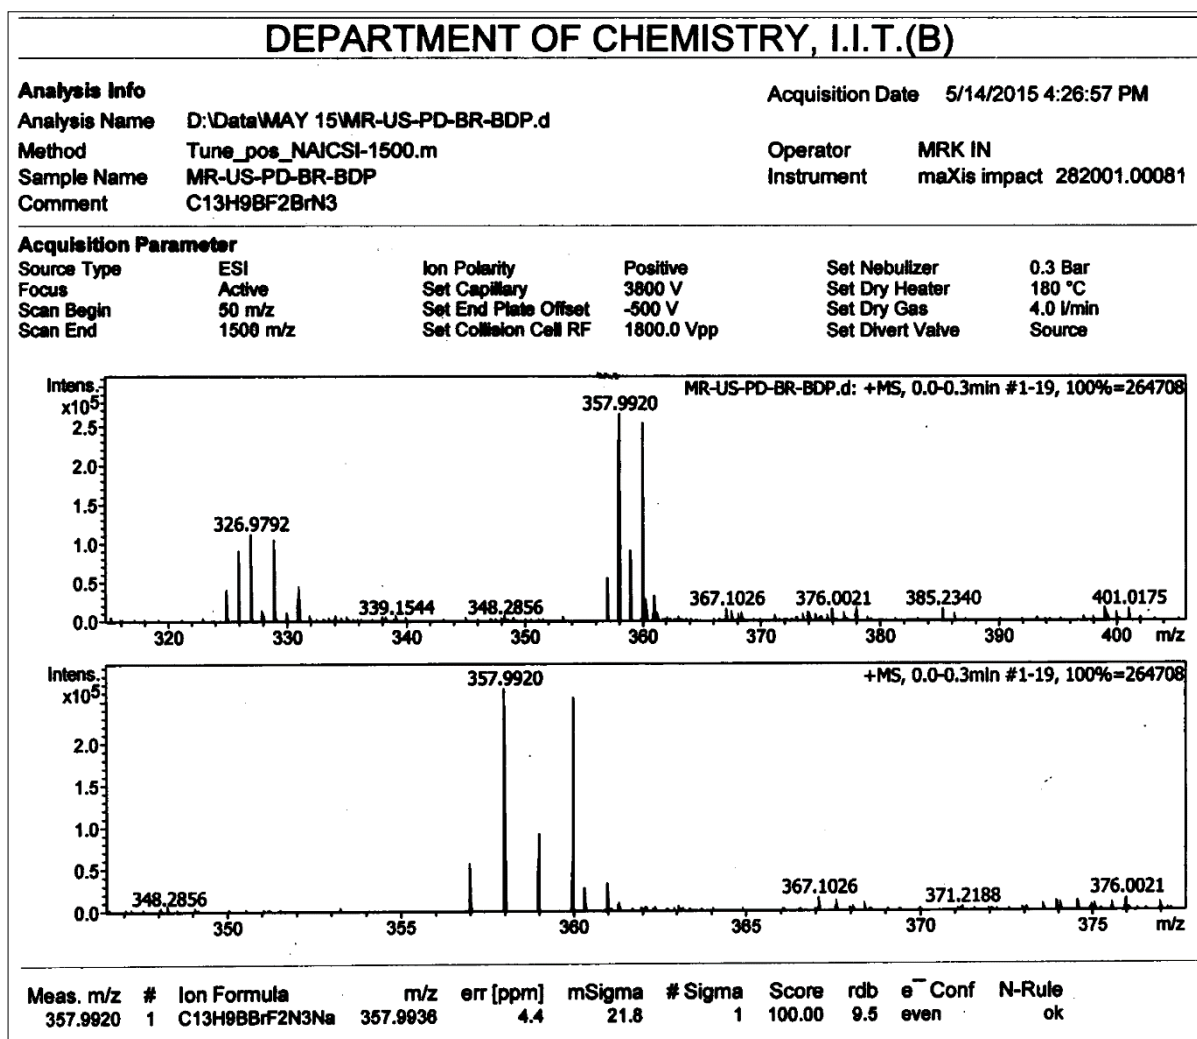

Figure S15: HRMS spectrum of compound 7.

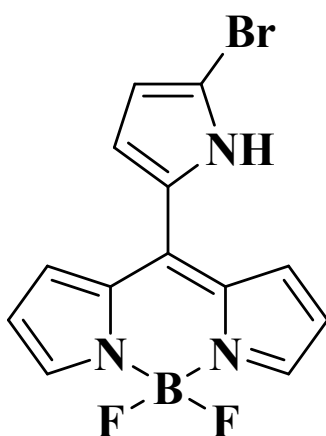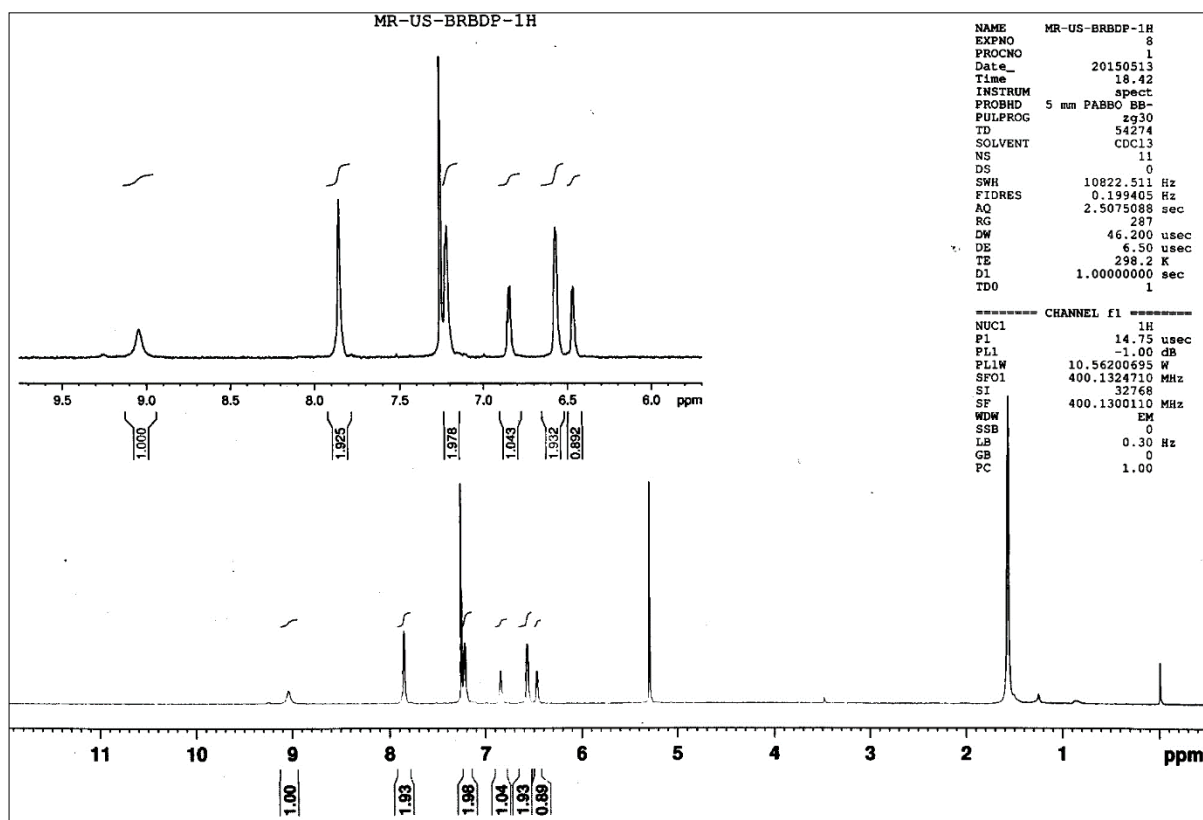

**Figure S16:**  $^1\text{H}$  NMR spectrum of compound **7** recorded in  $\text{CDCl}_3$ . Inset shows the expansion.

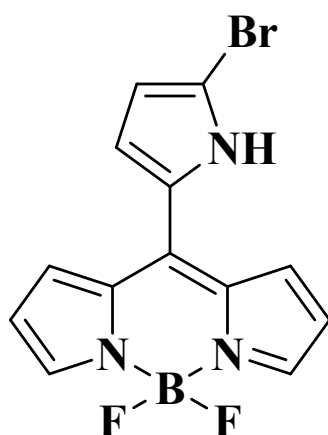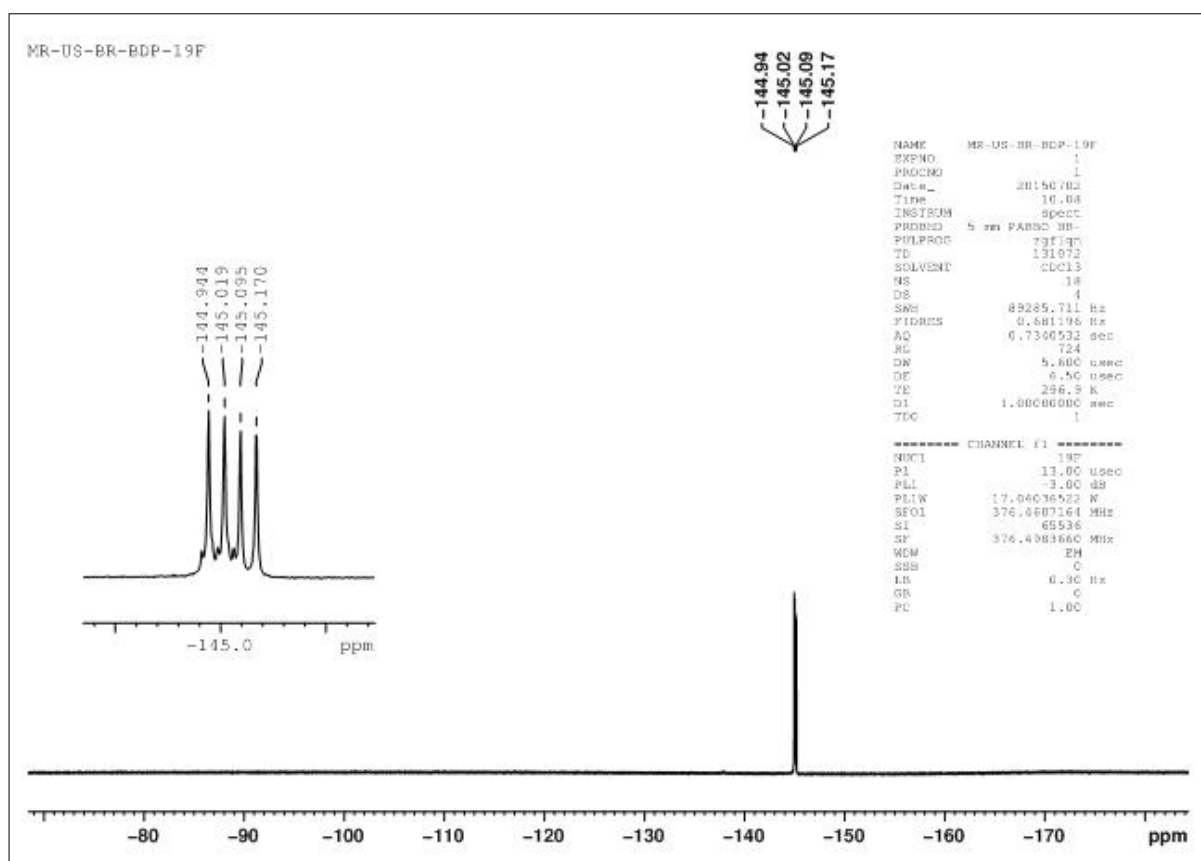

**Figure S17:**  $^{19}\text{F}$  NMR spectrum of compound **7** recorded in  $\text{CDCl}_3$ . Inset shows the expansion

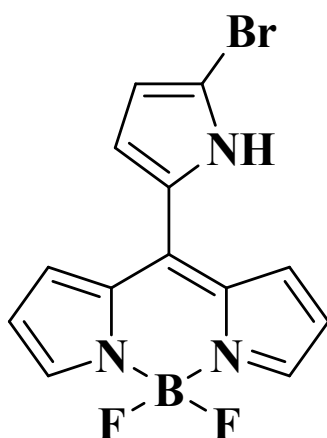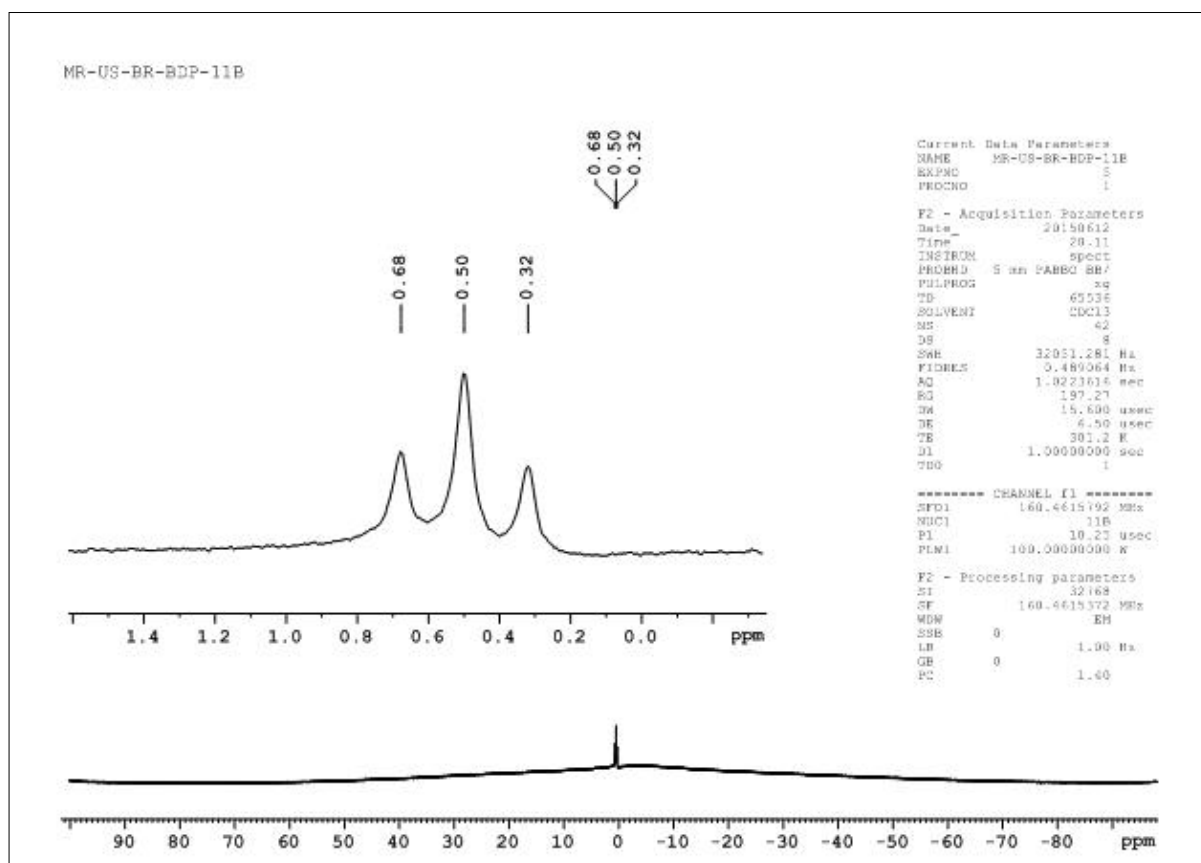

**Figure S18:**  $^{11}\text{B}$  NMR spectrum of compound **7** recorded in  $\text{CDCl}_3$ .

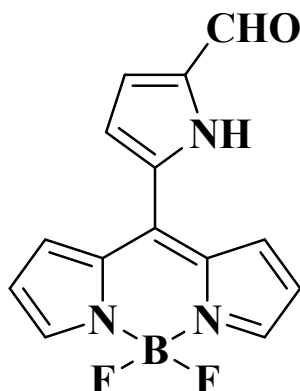

Calcd mol. wt. = 308.0780

Observed mol. Wt. = 308.0779

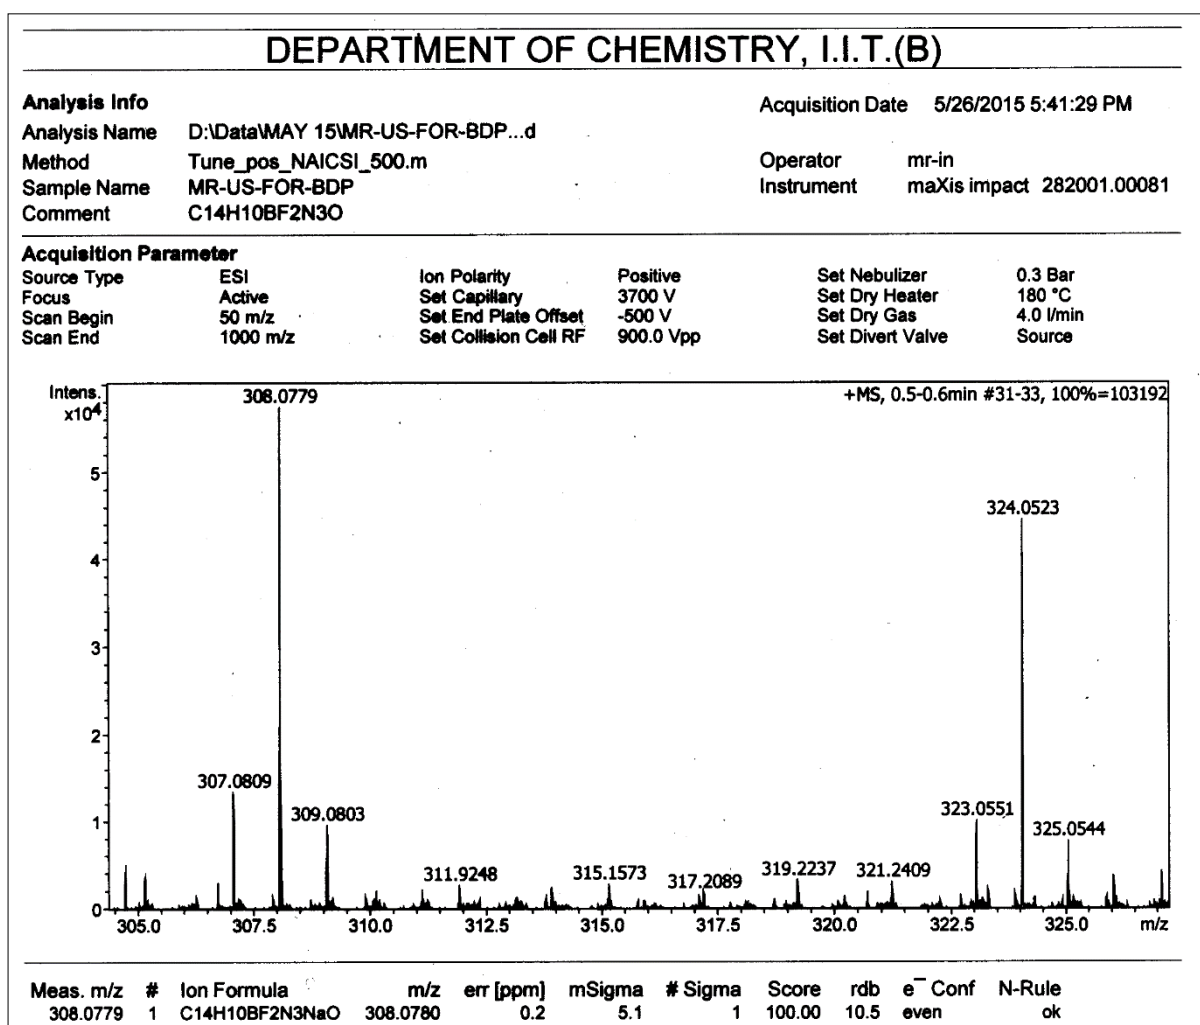

Figure S19: HRMS spectrum of compound 8

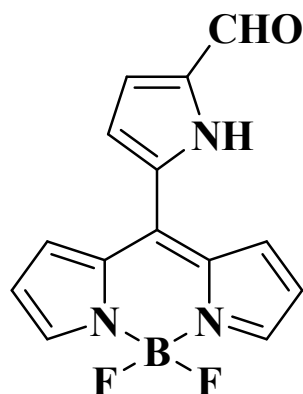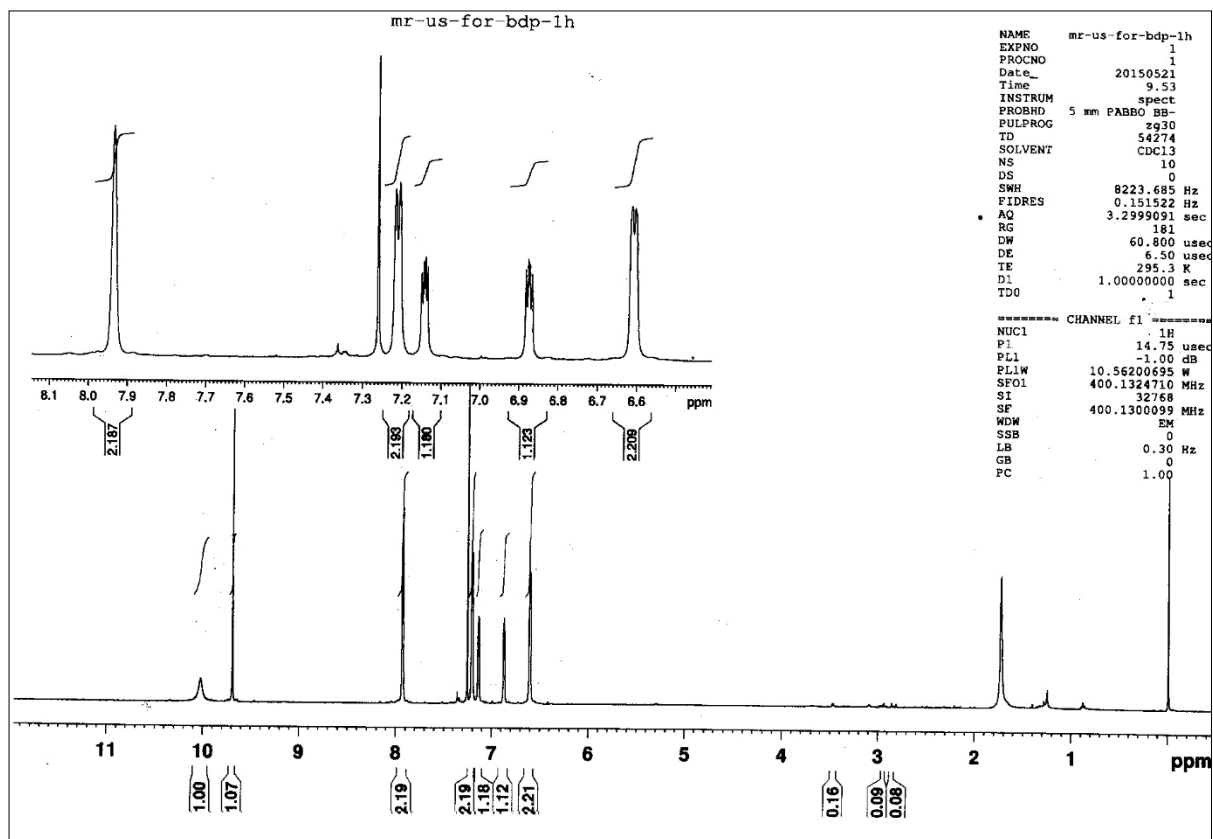

**Figure S20:**  $^1\text{H}$  NMR spectrum of compound **8** recorded in  $\text{CDCl}_3$ . Inset shows the Expansion.

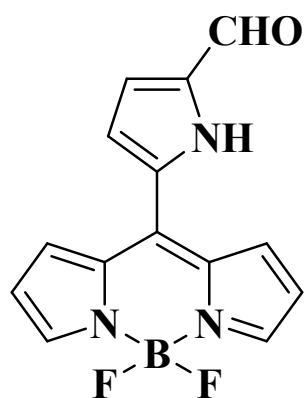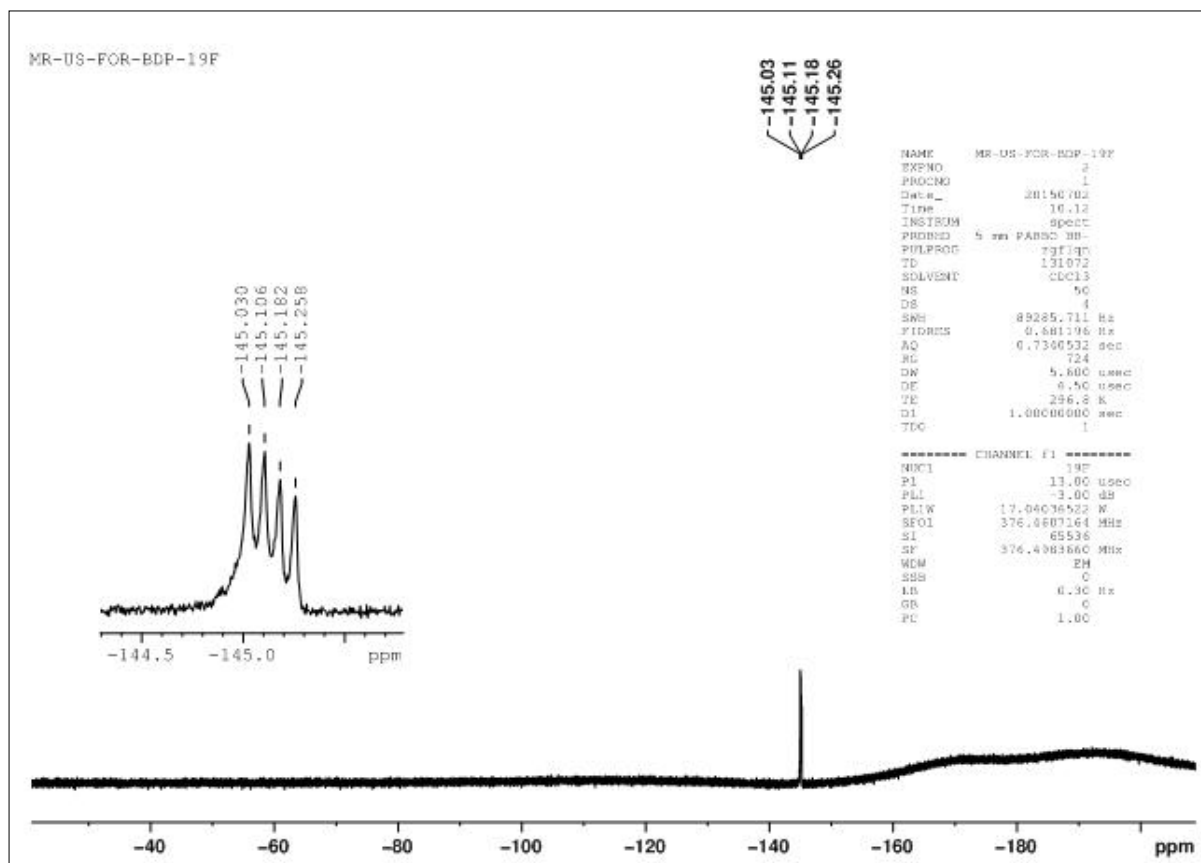

**Figure S21:**  $^1\text{H}$  NMR spectrum of compound **8** recorded in  $\text{CDCl}_3$ . Inset shows the Expansion.

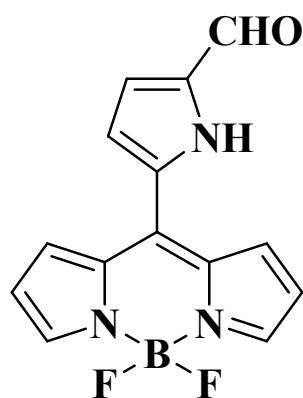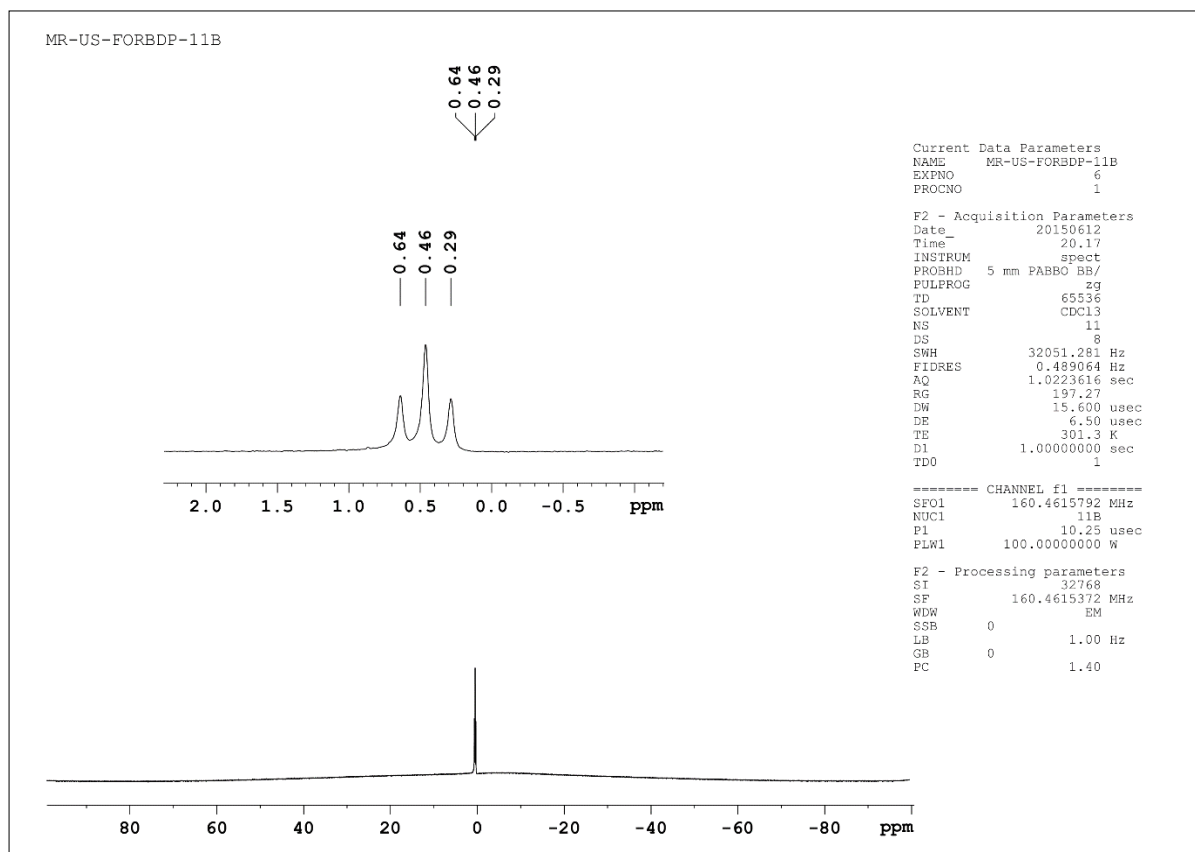

**Figure S22:**  $^{11}\text{B}$  NMR spectrum of compound **8** recorded in  $\text{CDCl}_3$ . Inset shows the Expansion.



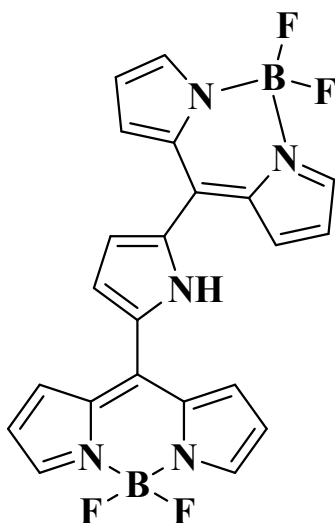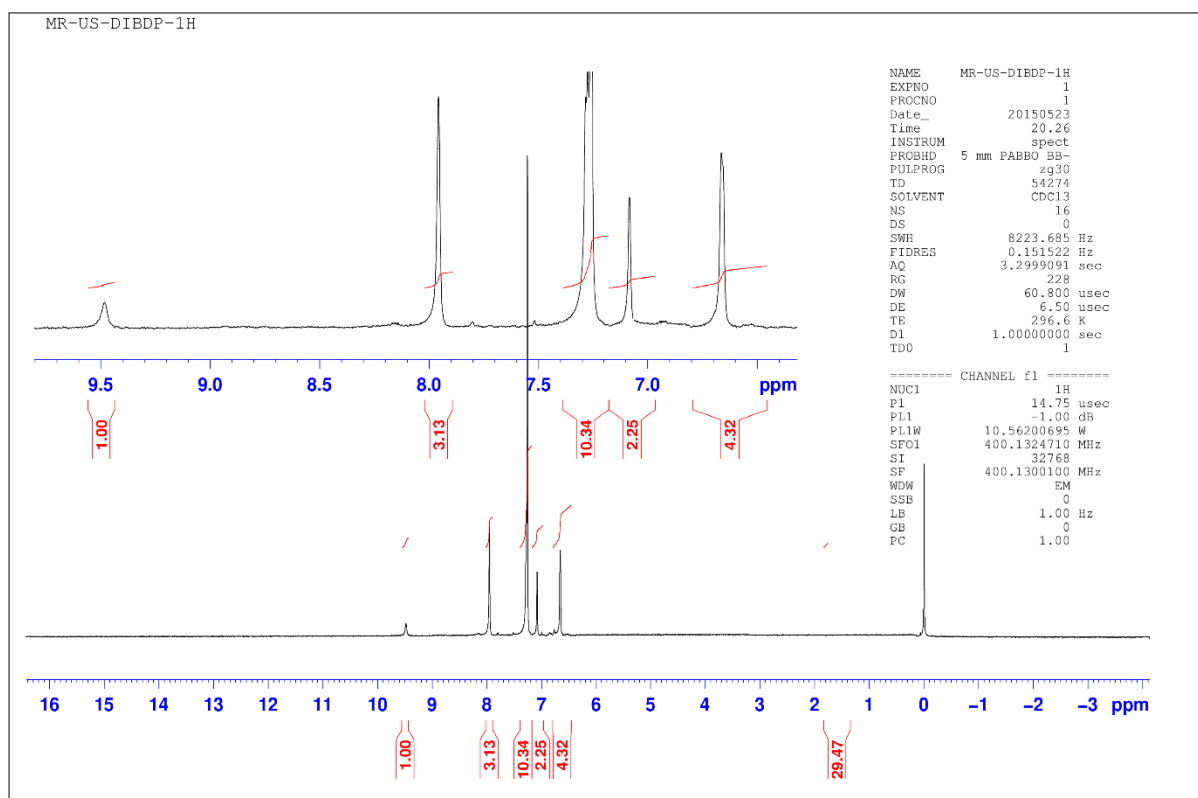

**Figure S23:**  $^1\text{H}$  NMR spectrum of compound **9** recorded in  $\text{CDCl}_3$ . Inset shows the Expansion.

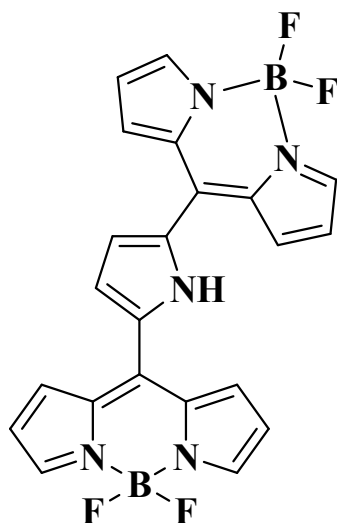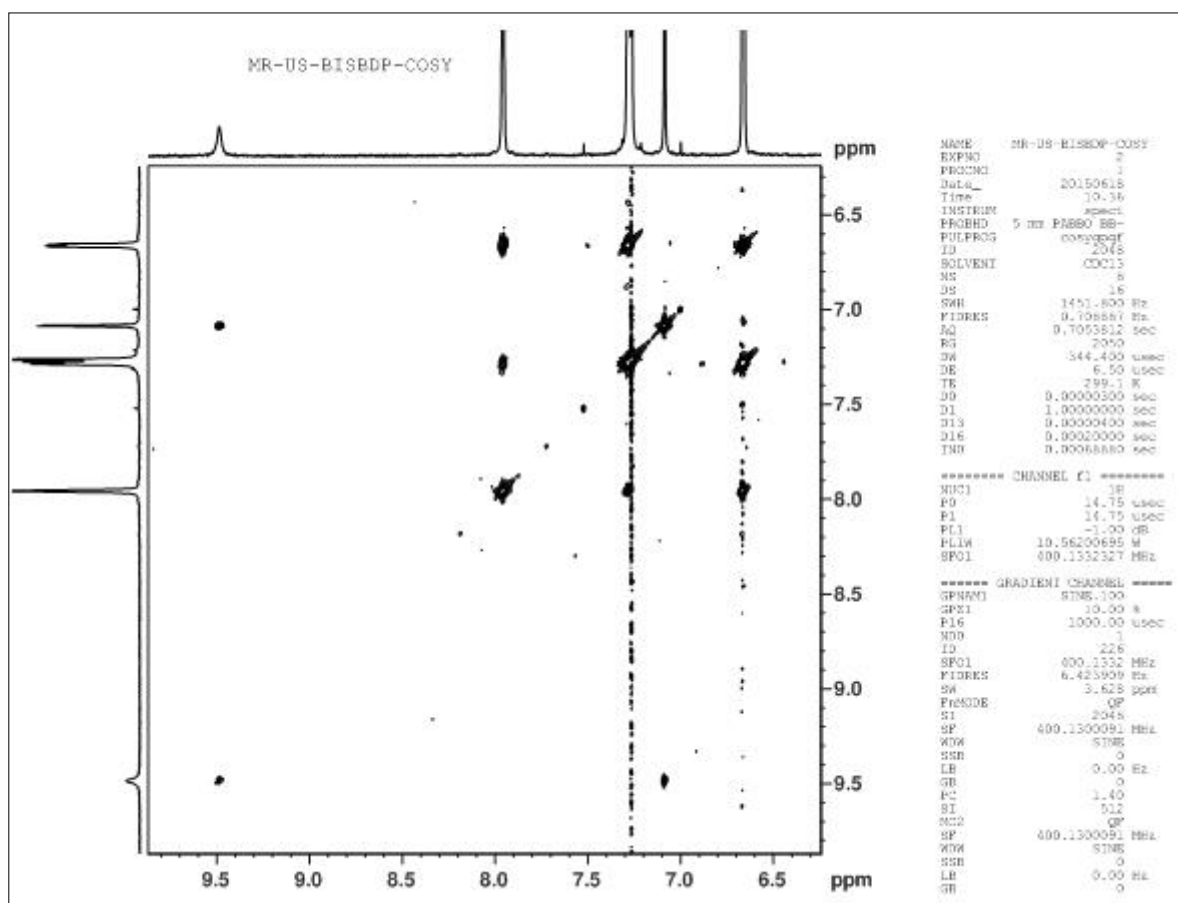

**Figure S24:**  $^1\text{H}$ - $^1\text{H}$  COSY spectrum of compound **9** recorded in  $\text{CDCl}_3$

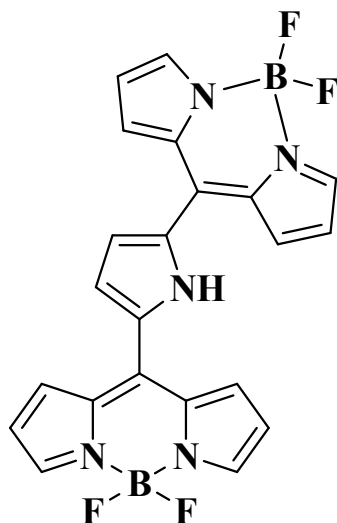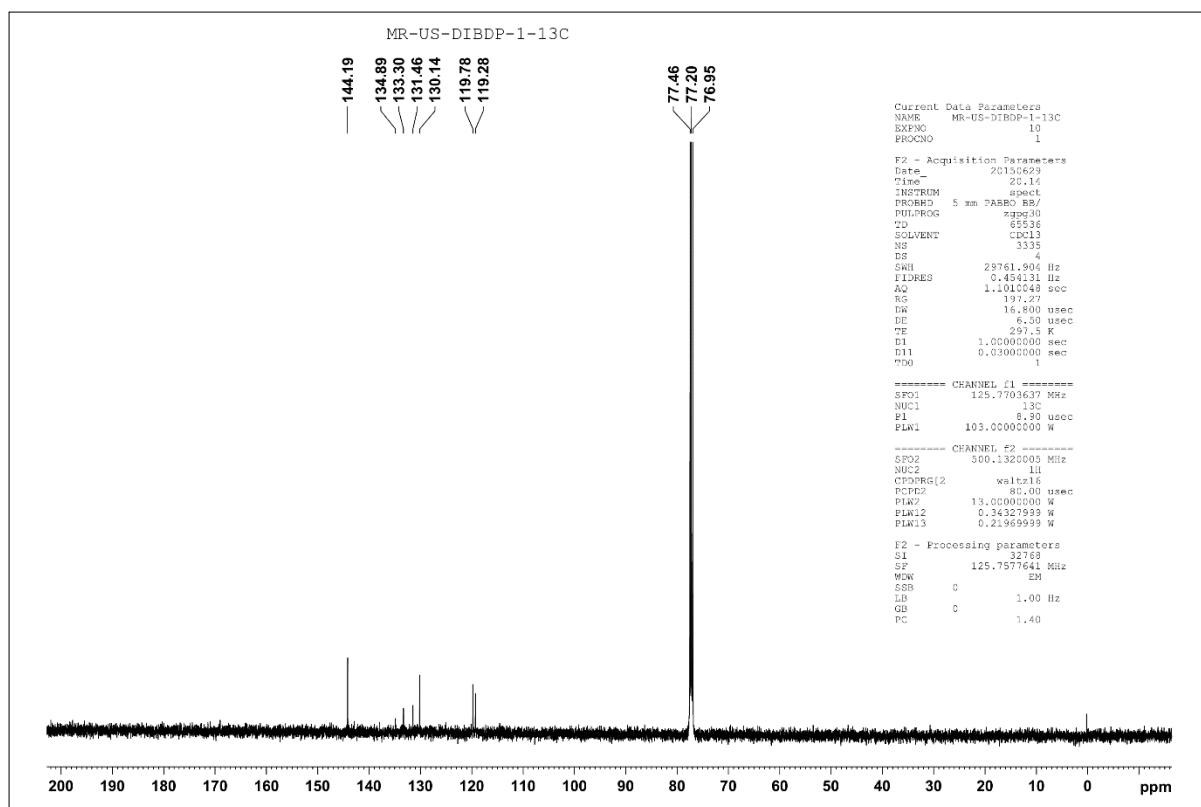

Figure S25:  $^{13}\text{C}$  NMR spectrum of compound **9** recorded in  $\text{CDCl}_3$ .

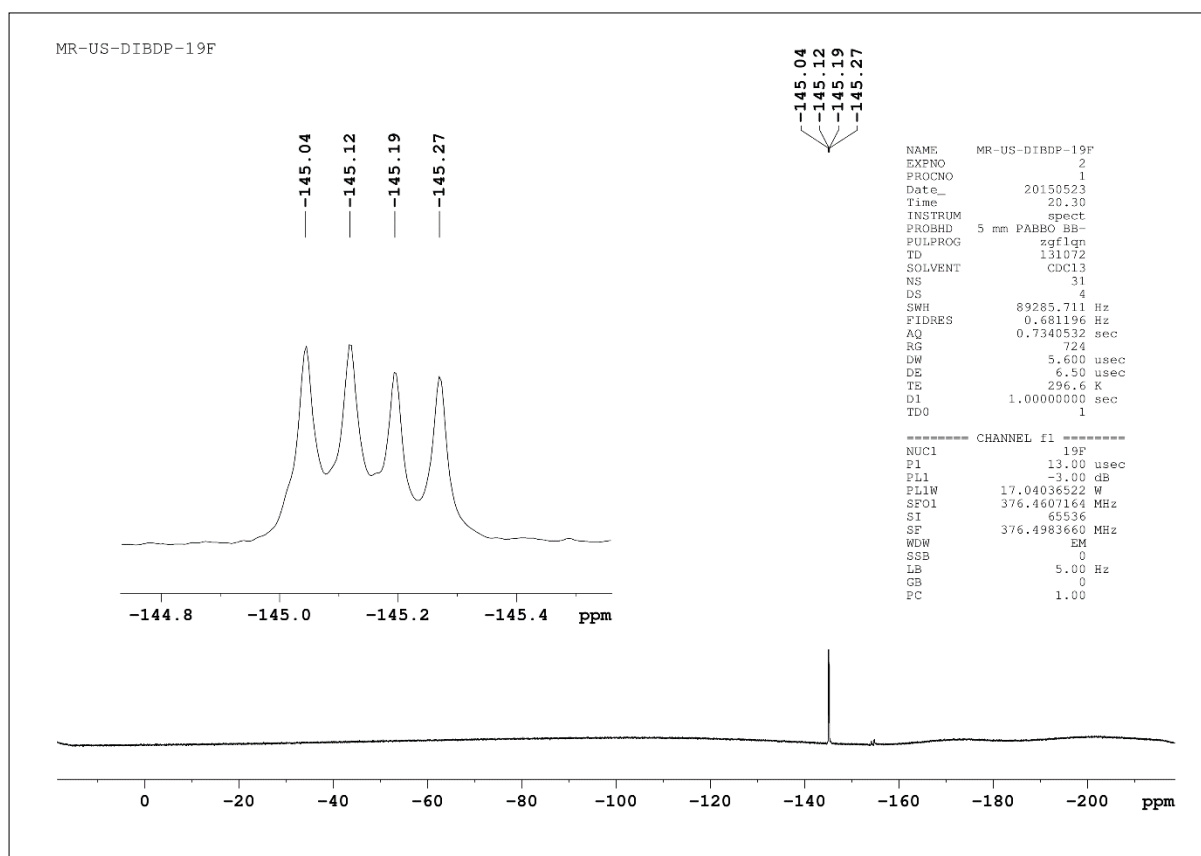

**Figure S26:**  $^{19}\text{F}$  NMR spectrum of compound **9** recorded in  $\text{CDCl}_3$ . Inset shows the Expansion.

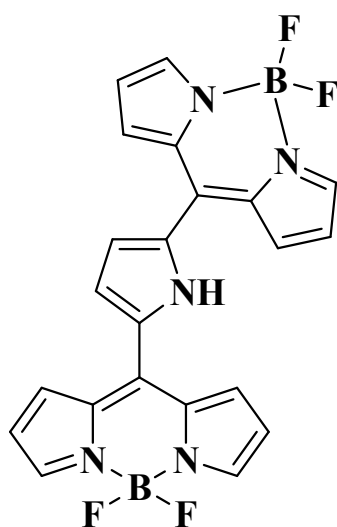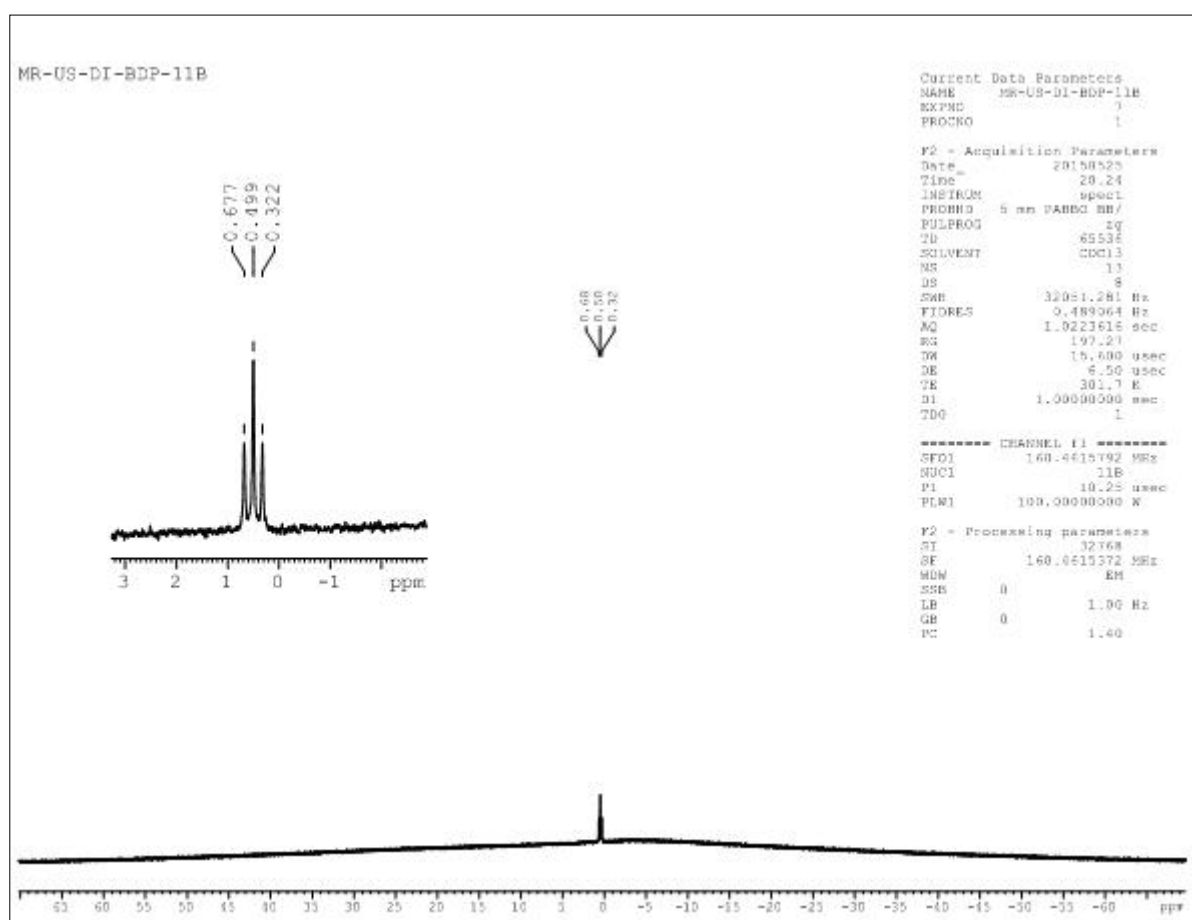

**Figure S27:**  $^{11}\text{B}$  NMR spectrum of compound **9** recorded in  $\text{CDCl}_3$ . Inset shows the Expansion.

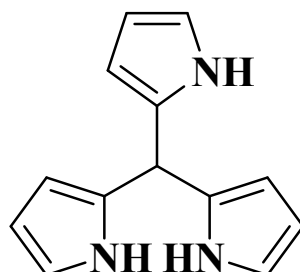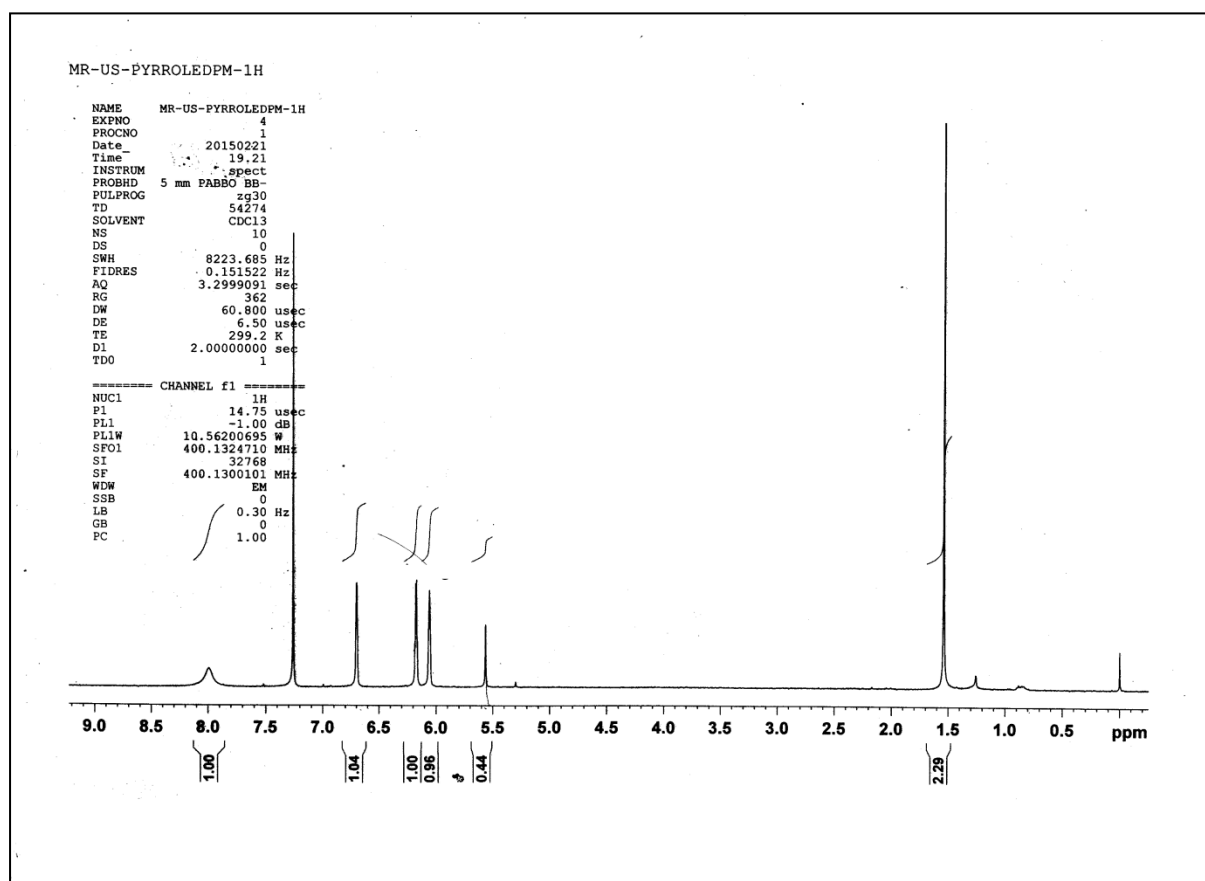

**Figure S28:**  $^1\text{H}$  NMR spectrum of compound **11** recorded in  $\text{CDCl}_3$ .

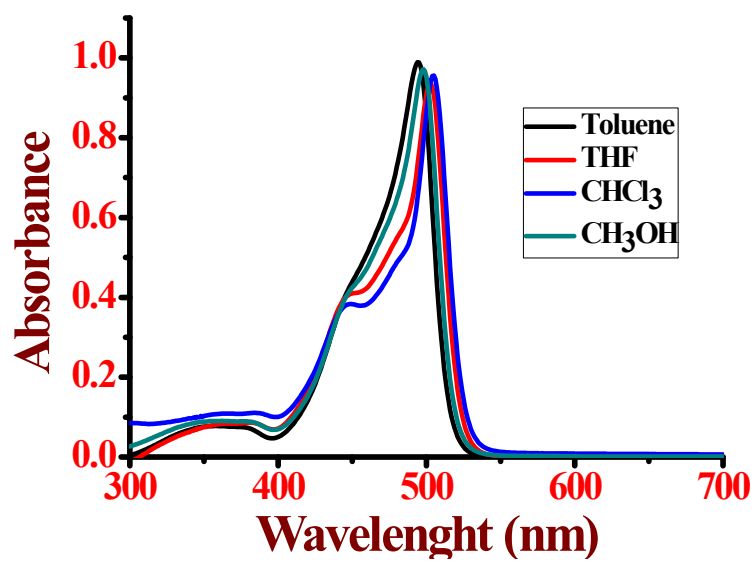

**Figure S29:** Comparison of absorption spectra of compound **5** ( $2 \times 10^{-5} \text{ M}$ ) recorded in different solvents.

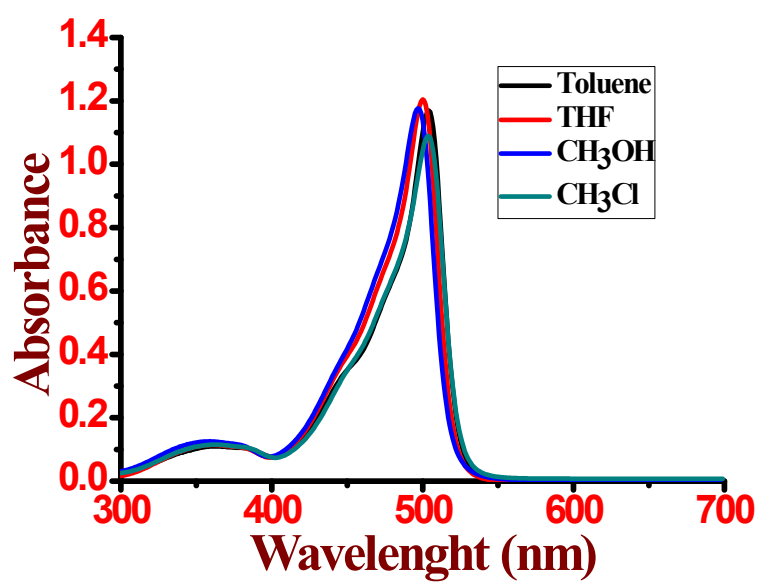

**Figure S30:** Comparison of absorption spectra of compound **6** ( $2 \times 10^{-5} \text{ M}$ ) recorded in different solvents.



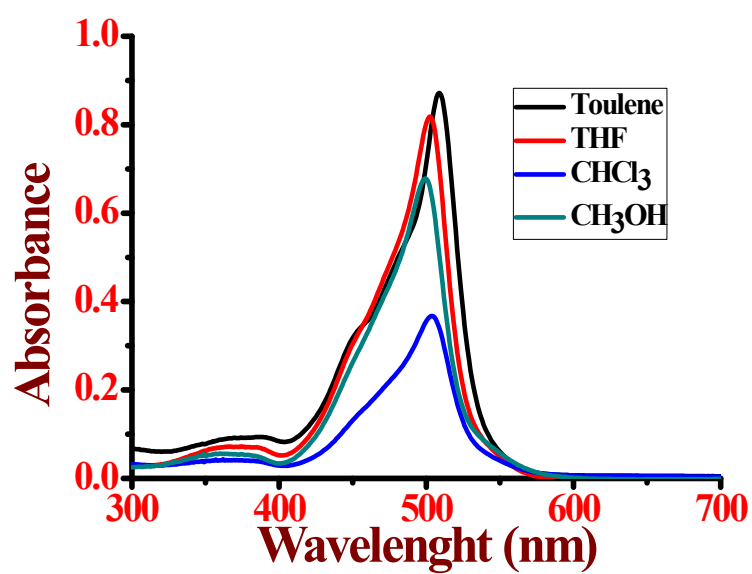

**Figure S31:** Comparison of absorption spectra of compound **7** ( $2 \times 10^{-5} \text{ M}$ ) recorded in different solvents.

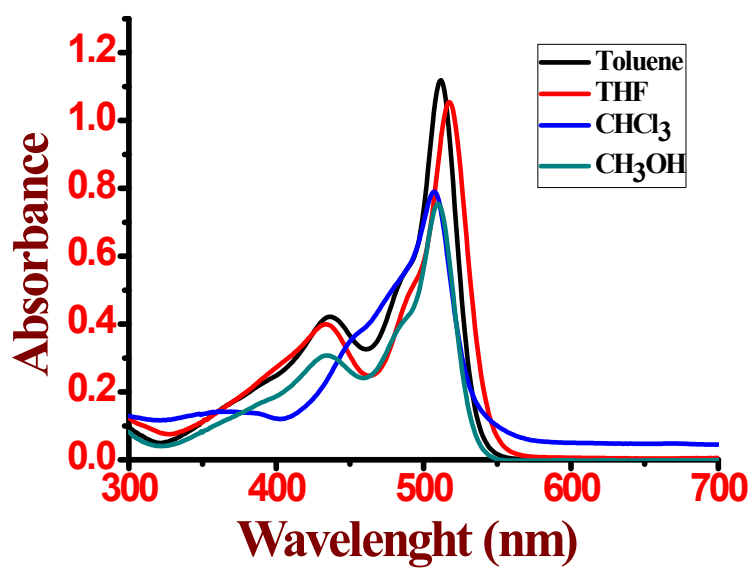

**Figure S32:** Comparison of absorption spectra of compound **8** ( $2 \times 10^{-5}$  M) recorded in different solvents.

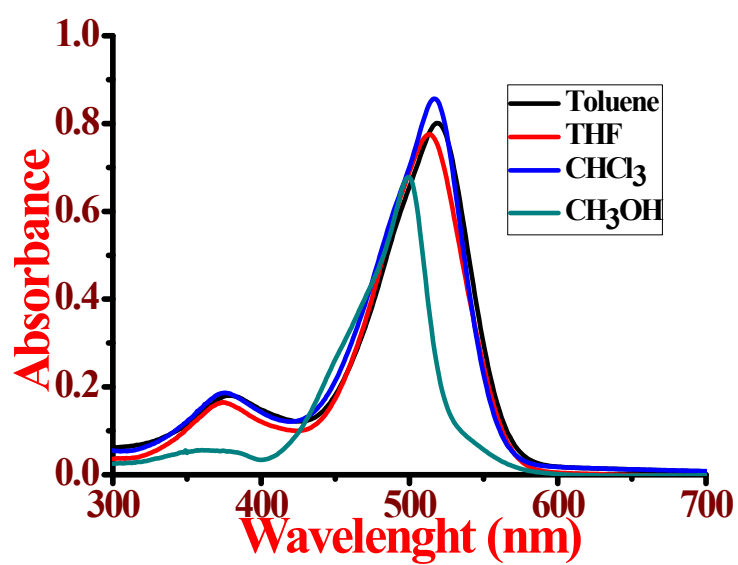

**Figure S33:** Comparison of absorption spectra of compound **9** ( $2 \times 10^{-5} \text{ M}$ ) recorded in different solvents.

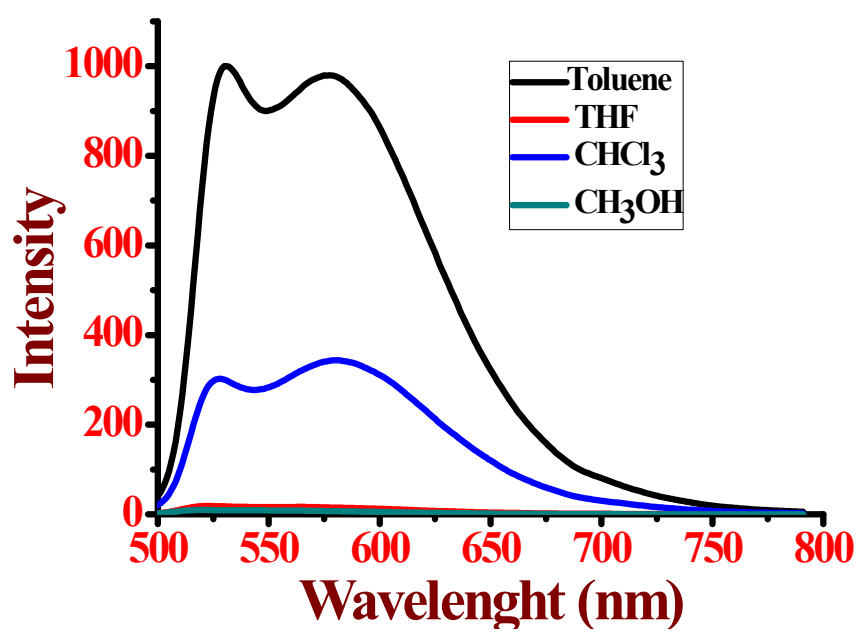

**Figure S34:** Comparison of emission spectrum of compound **5** ( $2 \times 10^{-5} \text{ M}$ ) recorded in different solvents

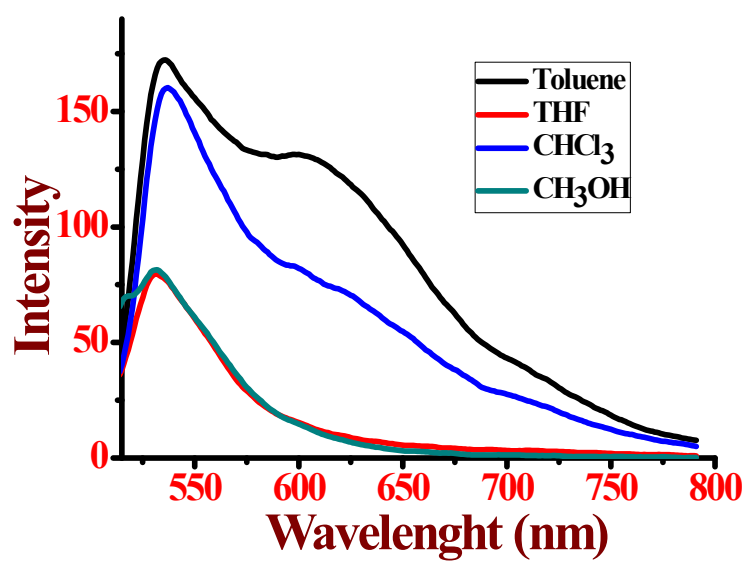

**Figure S35:** Comparison of emission spectrum of compound **6** ( $2 \times 10^{-5} \text{ M}$ ) recorded in different solvents

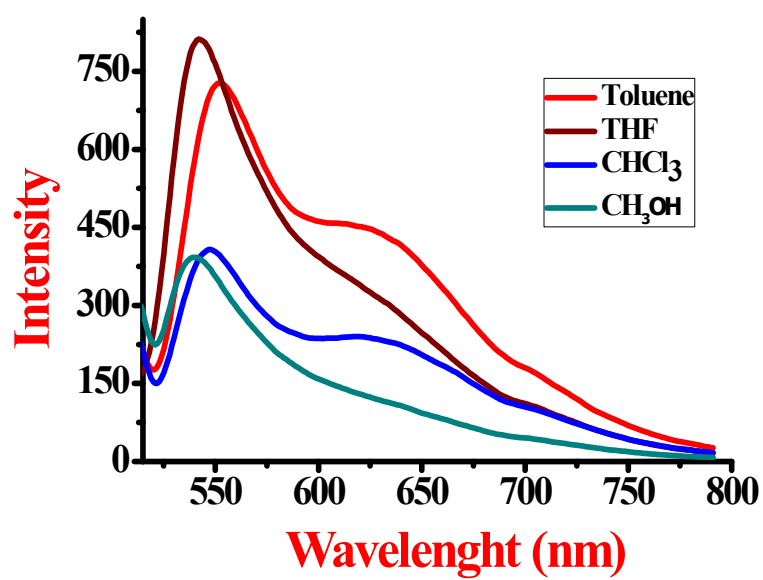

**Figure S36:** Comparison of emission spectrum of compound **8** ( $2 \times 10^{-5} \text{M}$ ) recorded in different solvents

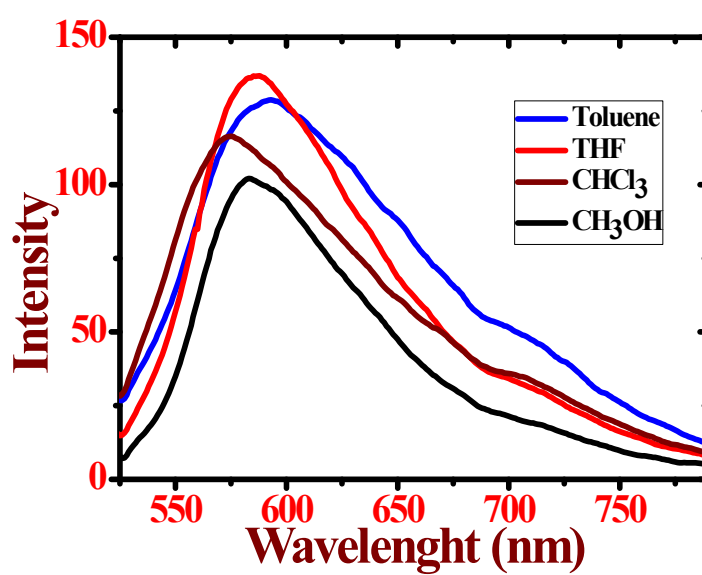

**Figure S37:** Comparison of emission spectrum of compound **9** ( $2 \times 10^{-5} \text{ M}$ ) recorded in different solvents

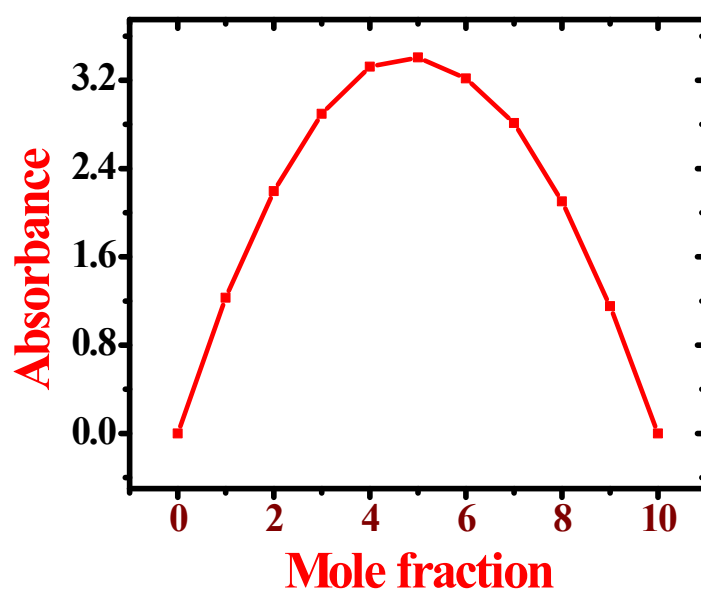

Figure S38. Job's plots of compound 5



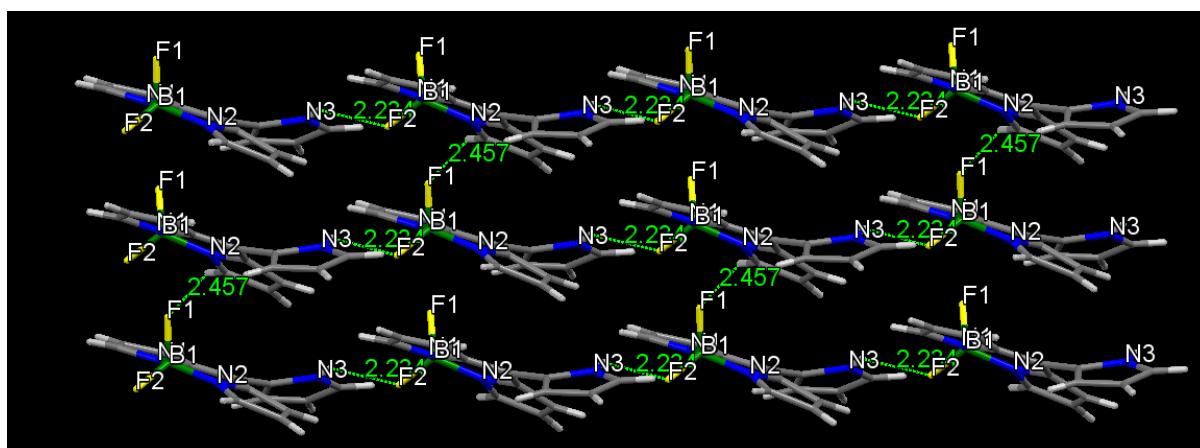

**Figure 39.** Supramolecular assembly through a weak intermolecular hydrogen bonding network in BODIPY **5**.

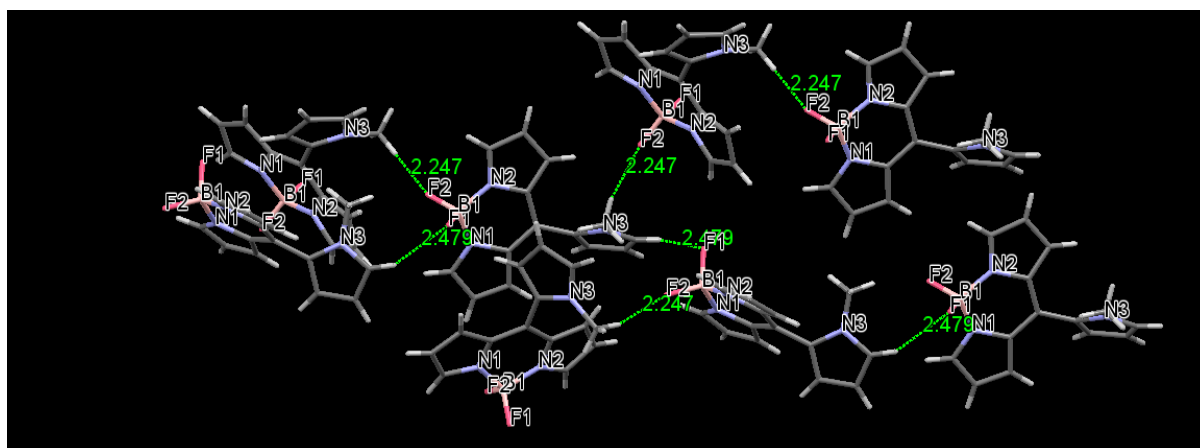

**Figure 40.** Supramolecular assembly through intermolecular-hydrogen bonding network (between Methyl-H and F (2.247 Å) which is attached to boron in Compound 6.

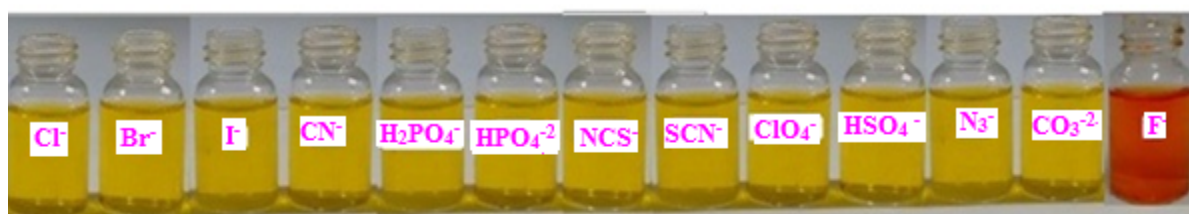

**Figure 41.** Optical response of BODIPY 5 after addition of different anions

## Experimental section

**General:** THF and n-hexane was dried over sodium benzophenone ketyl,  $\text{BF}_3$ ,  $\text{Et}_2\text{O}$ , 2,3-dichloro-5,6-dicyano-1,4-benzoquinone (DDQ) and TFA were used as obtained. All other chemicals used for the synthesis were reagent grade unless otherwise specified. Column chromatography was performed on silica (60-120 mesh) or alumina. All the  $^1\text{H}$  NMR spectra ( $\delta$  in ppm) were recorded using Bruker 400 and 500 MHz instruments.  $^{13}\text{C}$  NMR spectra were recorded on Bruker operating at 100.6 and 125.7 MHz. TMS was used as an internal reference for  $^1\text{H}$  and  $^{13}\text{C}$  ( $\delta$  77.0 signal) in  $\text{CDCl}_3$ . For UV-vis, the stock solution of compound **5** ( $2 \times 10^{-5}$  M) was prepared by using spectroscopic grade toluene.

Their corresponding UV-vis was recorded at 298 K. In  $^1\text{H}$  NMR titration, the spectra were measured on 400 MHz NMR spectrometer. A solution of **5** in  $\text{CDCl}_3$  was prepared ( $2 \times 10^{-5}$  M), and a 0.4 mL portion of this solution was transferred to a 5-mm NMR tube. A small aliquot of  $\text{Bu}_4\text{NF}$  in  $\text{CDCl}_3$  was added in an incremental fashion, and their corresponding spectra were recorded.

### **X-ray crystal structure analysis:**

Single-crystal X-ray structure analysis was performed on a Rigaku Saturn 724 diffractometer that was equipped with a low-temperature attachment. Data were collected at 100 K using graphite-monochromated Mo-K $\alpha$  radiation ( $\lambda_\alpha = 0.71073$  Å) with the  $\omega$ -scan technique. The data were reduced by using CrystalClear-SM Expert 2.1 b24 software. The structures were solved by direct methods and refined by least-squares against  $F^2$  utilizing the software packages SHELXL-97,<sup>33</sup> SIR-92,<sup>34</sup> and WINGX.<sup>35</sup> All non-hydrogen atoms were refined anisotropically.

### **References:**

- (33) G. M. Sheldrick, *Acta Crystallogr.*, 2008, **A64**, 112-122.
- (34) A. Altomare, G. Cascarano, C. Giacovazzo and A. Gualardi, *J. Appl. Crystallogr.*, 1993, **26**, 343-350.
- (35) L. J. Farrugia, *J. Appl. Crystallogr.*, 1999, **32**, 837-838.

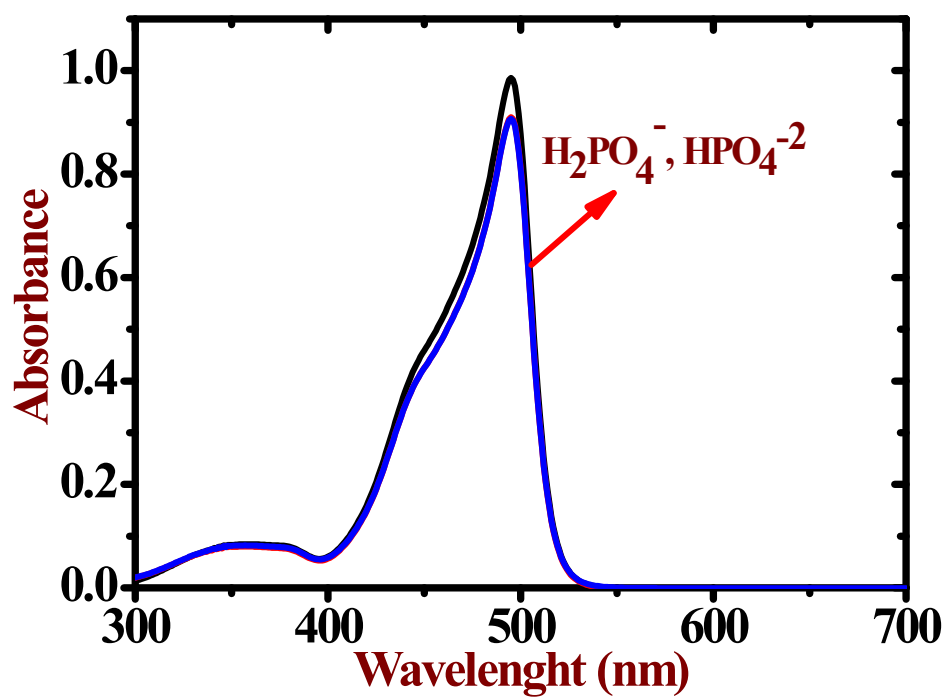

**Figure 42.** Absorption spectra of compound **5** ( $2 \times 10^{-5}\text{M}$ ) and after addition of  $\text{HPO}_4^{2-}$   $\text{H}_2\text{PO}_4^-$  recorded in Toluene

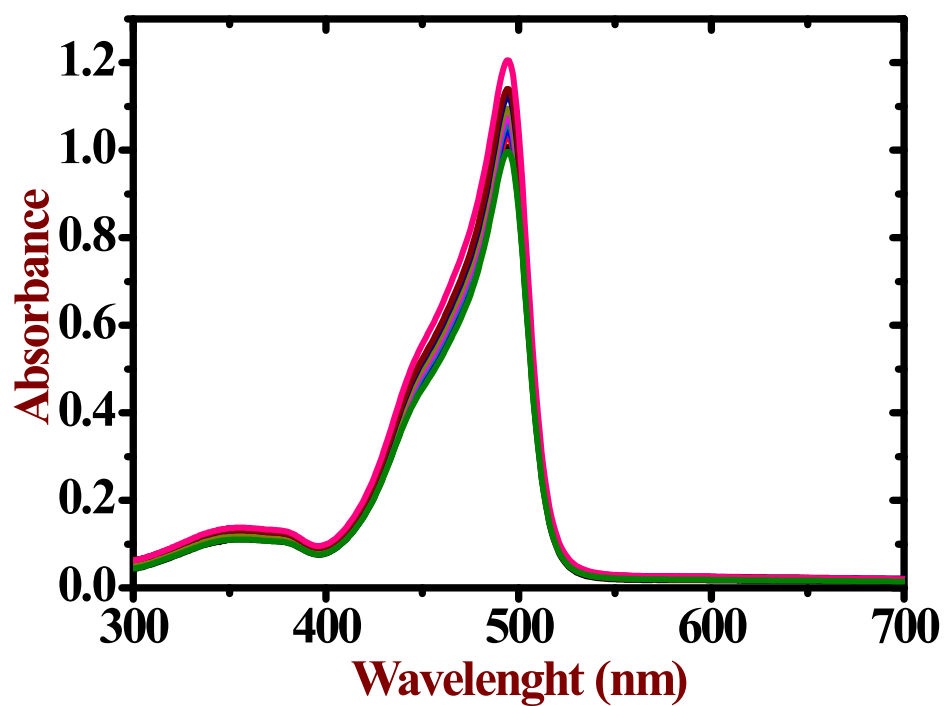

**Figure 43.** Absorption spectral change of compound **5** ( $2 \times 10^{-5}$  M) and after addition of different equivalents of F<sup>-</sup> (0-50 equiv.) recorded in CH<sub>3</sub>OH.

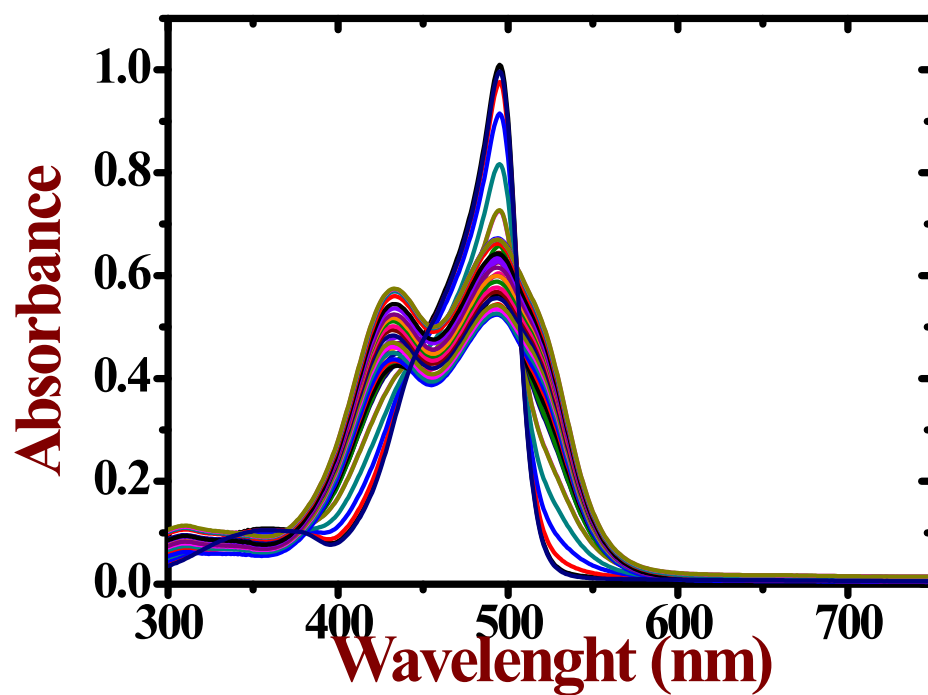

**Figure 44.** Absorption spectral changes of BODIPY **5** ( $2 \times 10^{-5}$  M) upon addition of increasing equivalents of F<sup>-</sup> ions (0–15 equiv) in CH<sub>3</sub>CN.



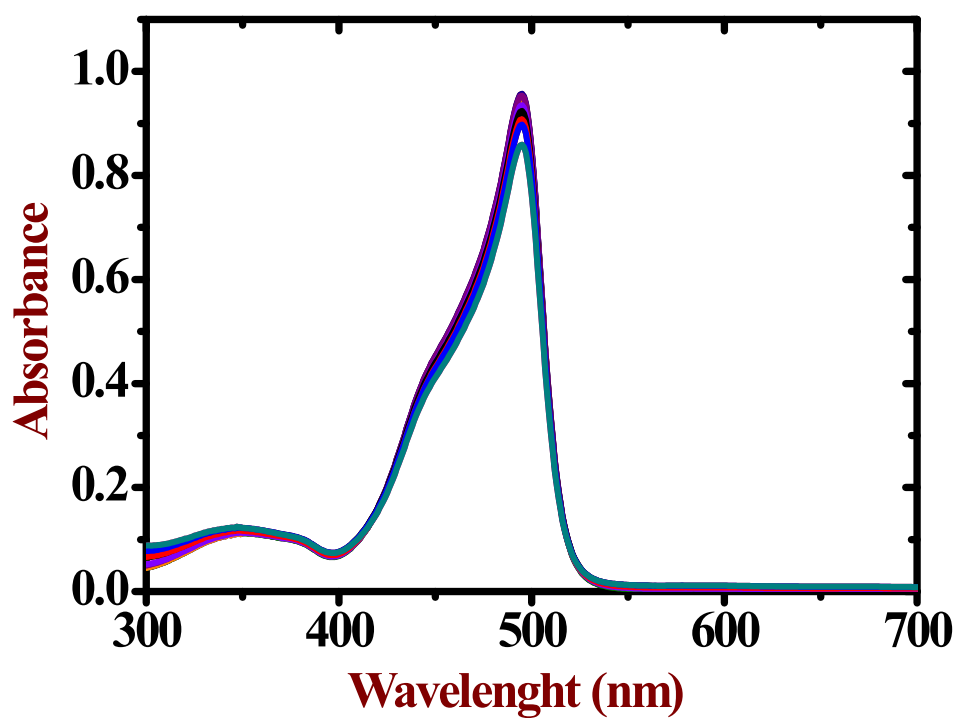

**Figure 45.** Absorption spectral changes of BODIPY **5** ( $2 \times 10^{-5}$  M) upon addition of increasing equivalents of F<sup>-</sup> ions (0–50 equiv) in CH<sub>3</sub>CN:H<sub>2</sub>O (9:1).
